# Supplementary material for: Enantioselective Mukaiyama–Michael with 2-enoyl pyridine N-oxides catalyzed by PYBOX-DIPH-Zn(ii)-complexes at ambient temperature
Source: Royal Society of Chemistry journal article supplement (doi:10.1039/c3ob40445e), 2013-01-01
Supplement: c3ob40445e.pdf [file c3ob40445e.pdf]

## Supporting Information

### Enantioselective Mukaiyama-Michael with 2-Enoyl Pyridine *N*-Oxides Catalyzed by PYBOX-DIPH-Zn(II)-Complexes at Ambient Temperature

*Subhrajit Rout,<sup>a</sup> Sumit K. Ray,<sup>b</sup> and Vinod K. Singh<sup>\*a,b</sup>*

<sup>a</sup> *Department of Chemistry, Indian Institute of Science Education and Research Bhopal, Bhopal, MP 462 023, India*

<sup>b</sup> *Department of Chemistry, Indian Institute of Technology Kanpur, Kanpur, UP - 208 016, India*

E-mail: [vinodks@iitk.ac.in](mailto:vinodks@iitk.ac.in)

#### Table of contents

|                                                                                                |         |
|------------------------------------------------------------------------------------------------|---------|
| X-ray crystal structure of ( <i>S</i> )- <b>4n</b>                                             | S2      |
| Crystallographic Data and Pertinent Refinement Parameters for <b>4n</b>                        | S2- S3  |
| <sup>1</sup> H NMR, <sup>13</sup> C NMR spectra and HPLC Chromatogram for compounds <b>4-8</b> | S4-S42  |
| Mass spectra for compounds <b>4-6</b>                                                          | S43-S52 |

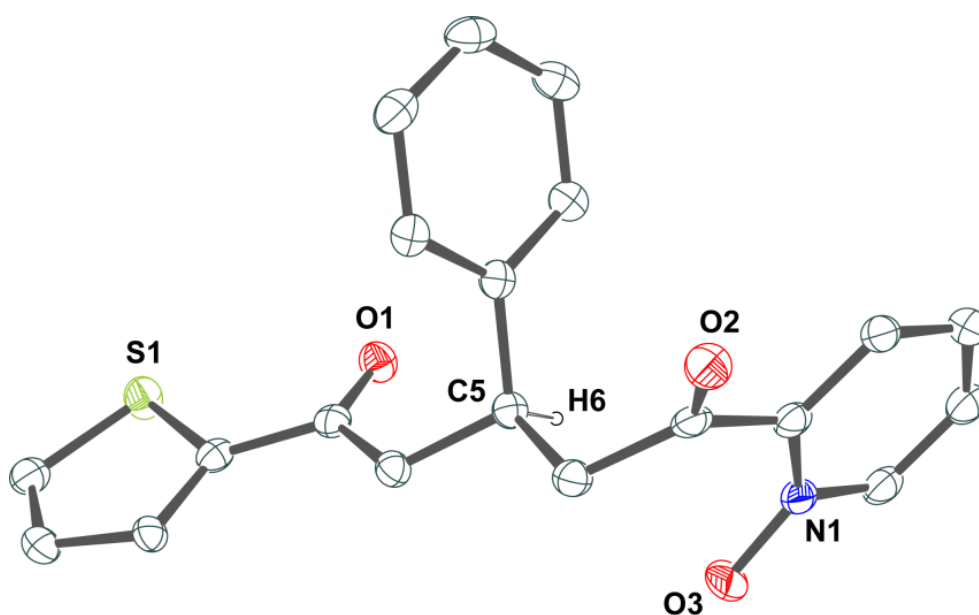

Figure 3. ORTEP diagrams of **4n** with thermal ellipsoids at the 50% probability limit (other H-atoms are deleted for clarity).

Table 1. Crystal data and structure refinement parameters of compound **4n**.

| Parameters                  | Compound <b>4n</b>                                                                                                                               |
|-----------------------------|--------------------------------------------------------------------------------------------------------------------------------------------------|
| Empirical formula           | C <sub>20</sub> H <sub>17</sub> N O <sub>3</sub> S                                                                                               |
| Formula weight              | 351.41                                                                                                                                           |
| Temperature                 | 273(2) K                                                                                                                                         |
| Wavelength                  | 0.71073 Å                                                                                                                                        |
| Crystal system, space group | Monoclinic, <i>P</i> 2 <sub>1</sub>                                                                                                              |
| Unit cell dimensions        | $a = 11.7359(8)$ Å<br>$b = 5.5595(4)$ Å<br>$c = 12.5993(9)$ Å<br>$\alpha = 90.000^\circ$<br>$\beta = 90.641(2)^\circ$<br>$\gamma = 90.000^\circ$ |

|                                   |                                                      |
|-----------------------------------|------------------------------------------------------|
| Volume                            | 822.00(10) Å <sup>3</sup>                            |
| Z, Calculated density             | 2, 1.420 Mg/m <sup>3</sup>                           |
| Absorption coefficient            | 0.216 mm <sup>-1</sup>                               |
| F(000)                            | 368                                                  |
| Colour, Shape                     | Colourless, Block                                    |
| Crystal size                      | 0.22 x 0.18 x 0.16 mm <sup>3</sup>                   |
| θ range for data collection       | 2.36 to 25.50°                                       |
| Limiting indices                  | -13 ≤ h ≤ 14, -6 ≤ k ≤ 6,<br>-15 ≤ l ≤ 14            |
| Reflections collected / unique    | 5875 / 3009<br>[R(int) = 0.0193]                     |
| Reflections used                  | 4834                                                 |
| Completeness to theta             | 99.9 %                                               |
| Data / restraints / parameters    | 3009 / 1 / 226                                       |
| Goodness-of-fit on F <sup>2</sup> | 1.075                                                |
| Final R indices [I > 2σ(I)]       | R <sub>1</sub> = 0.0296,<br>wR <sub>2</sub> = 0.0708 |
| R indices (all data)              | R <sub>1</sub> = 0.0323,<br>wR <sub>2</sub> = 0.0726 |
| Flack parameter                   | -0.05(7)                                             |
| Largest diff. peak and hole       | 0.207 and -0.167 e.Å <sup>-3</sup>                   |

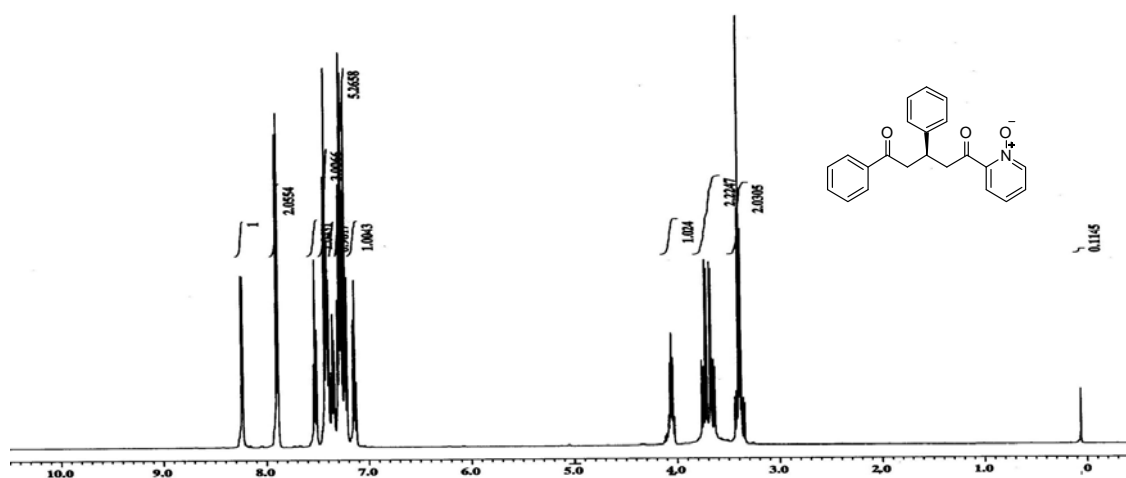

500 MHz  $^1\text{H}$  NMR spectra of compound **4a** in  $\text{CDCl}_3$

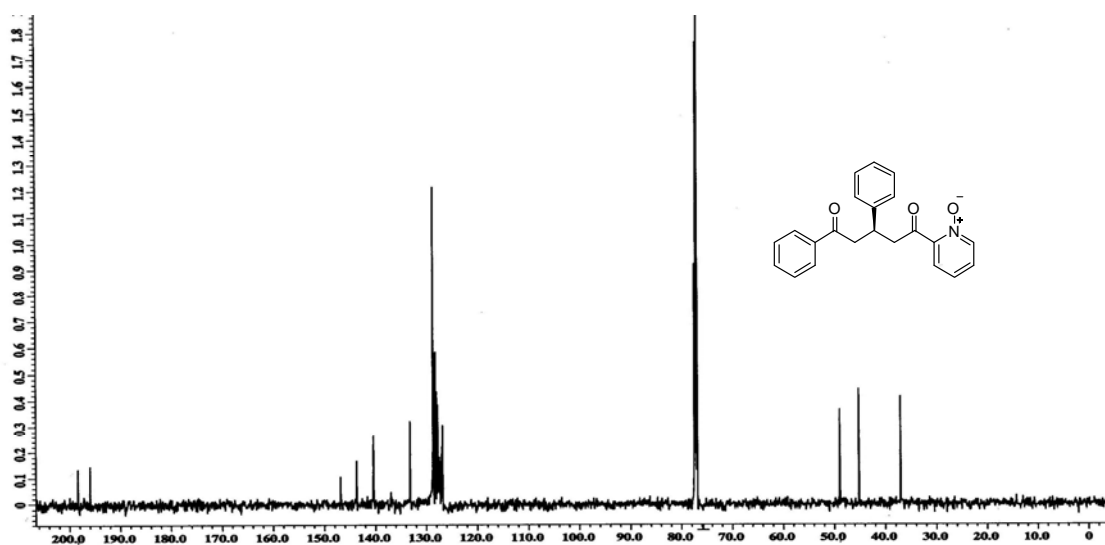

125 MHz  $^{13}\text{C}$  NMR spectra of compound **4a** in  $\text{CDCl}_3$

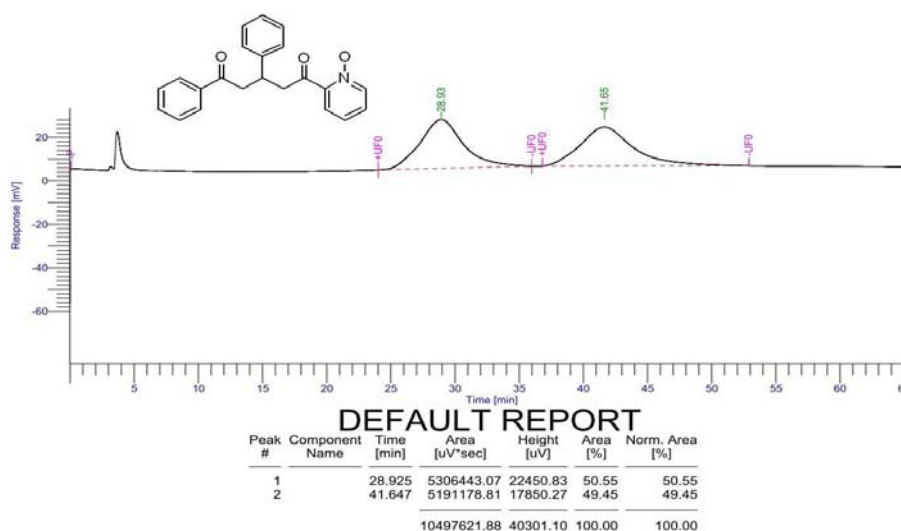

HPLC chromatogram of compound **4a** (racemic)

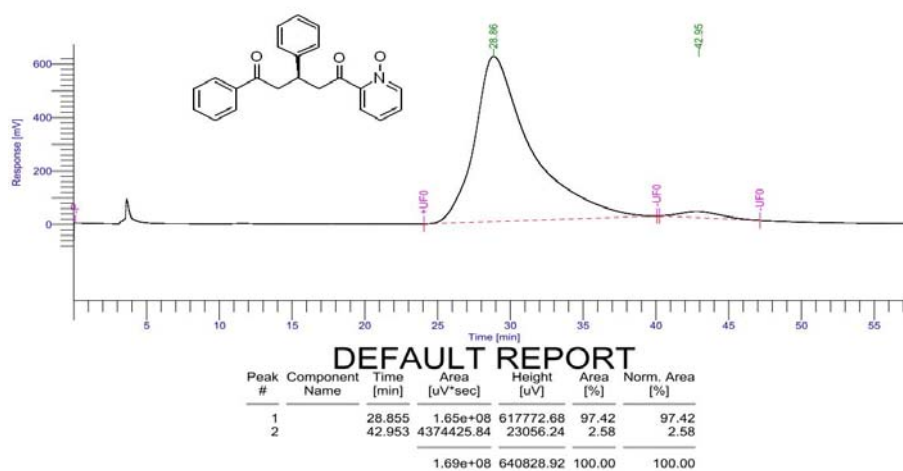

HPLC chromatogram of compound **4a** (Chiral)

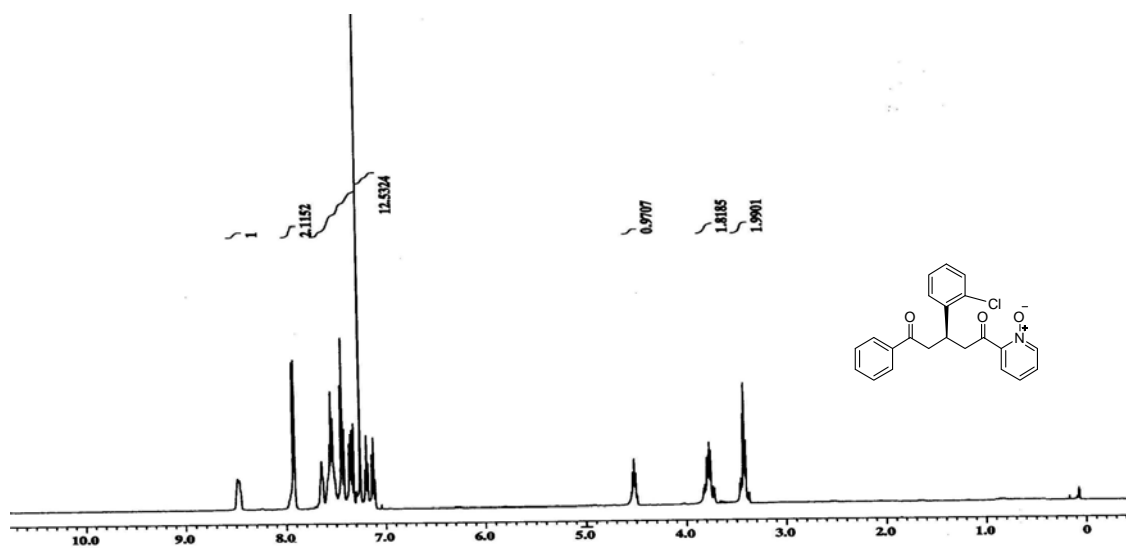

500 MHz  $^1\text{H}$  NMR spectra of compound **4b** in  $\text{CDCl}_3$

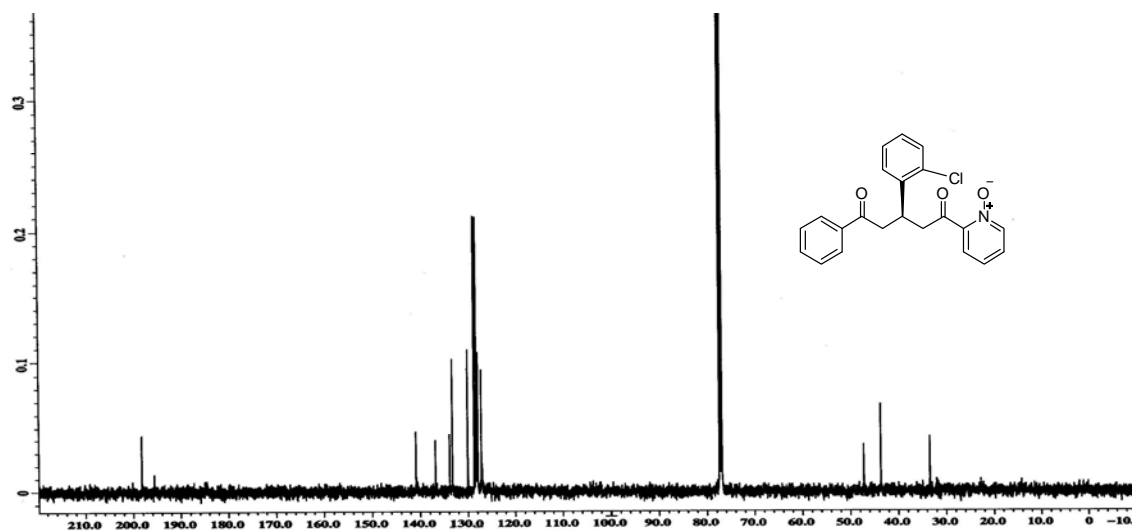

125 MHz  $^{13}\text{C}$  NMR spectra of compound **4b** in  $\text{CDCl}_3$

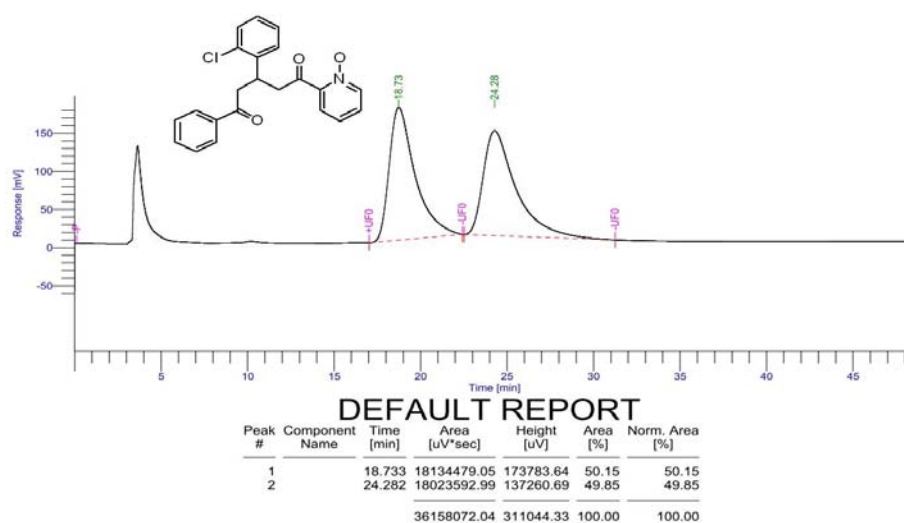

HPLC chromatogram of compound **4b** (racemic)

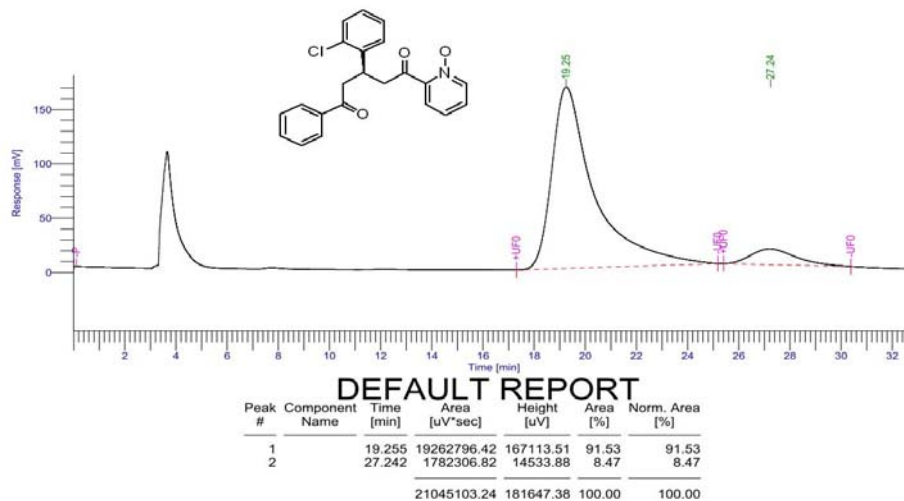

HPLC chromatogram of compound **4b** (chiral)

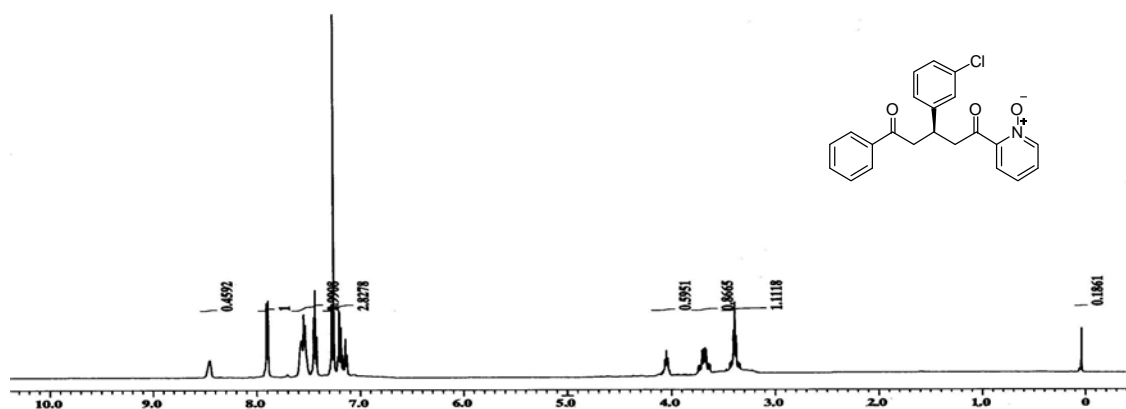

500 MHz  $^1\text{H}$  NMR spectra of compound **4c** in  $\text{CDCl}_3$

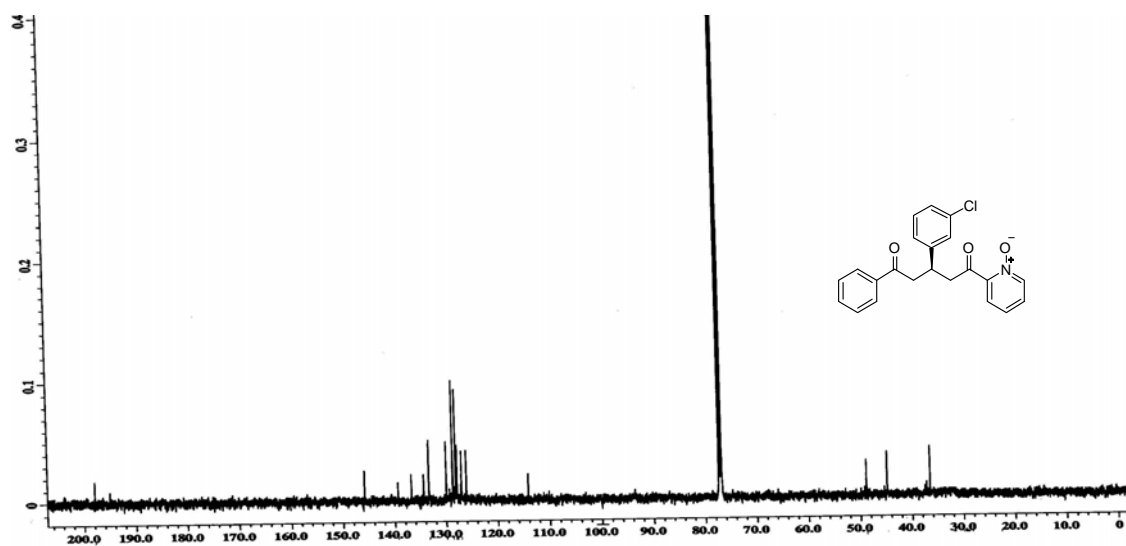

125 MHz  $^{13}\text{C}$  NMR spectra of compound **4c** in  $\text{CDCl}_3$



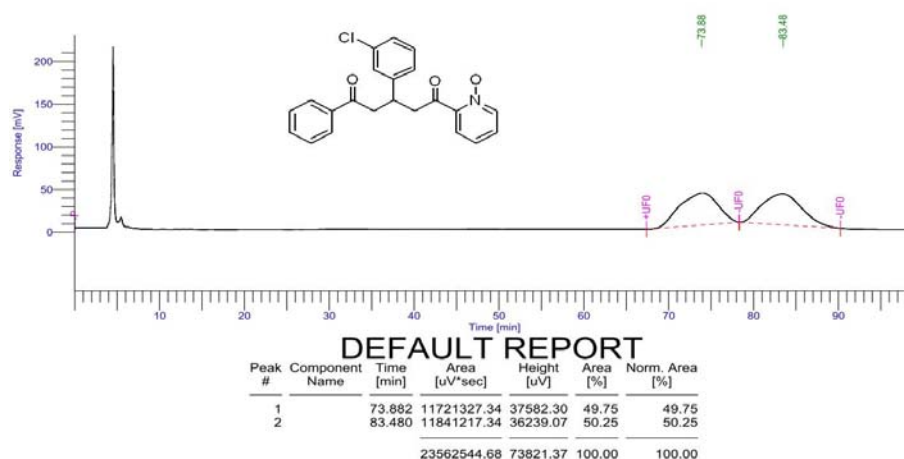

HPLC chromatogram of compound **4c** (racemic)

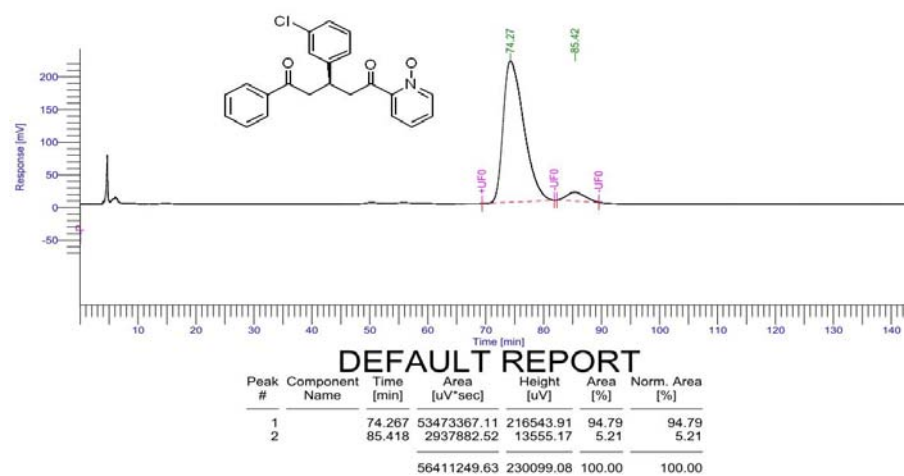

HPLC chromatogram of compound **4c** (Chiral)

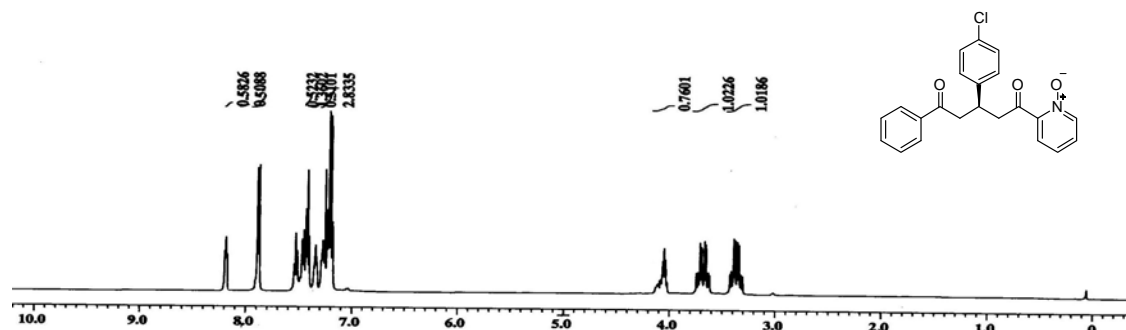

500 MHz  $^1\text{H}$  NMR spectra of compound **4d** in  $\text{CDCl}_3$

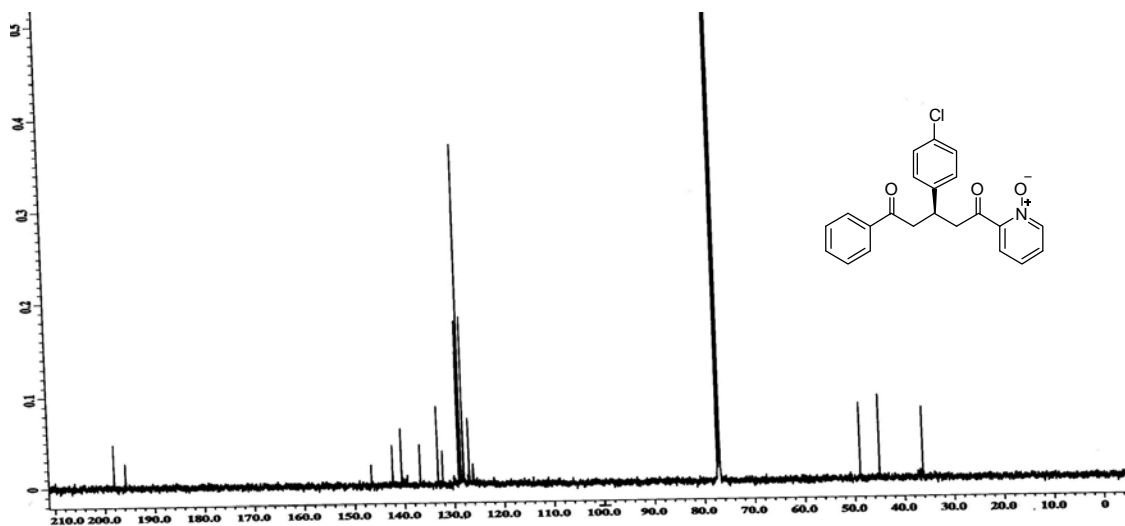

125 MHz  $^{13}\text{C}$  NMR spectra of compound **4d** in  $\text{CDCl}_3$

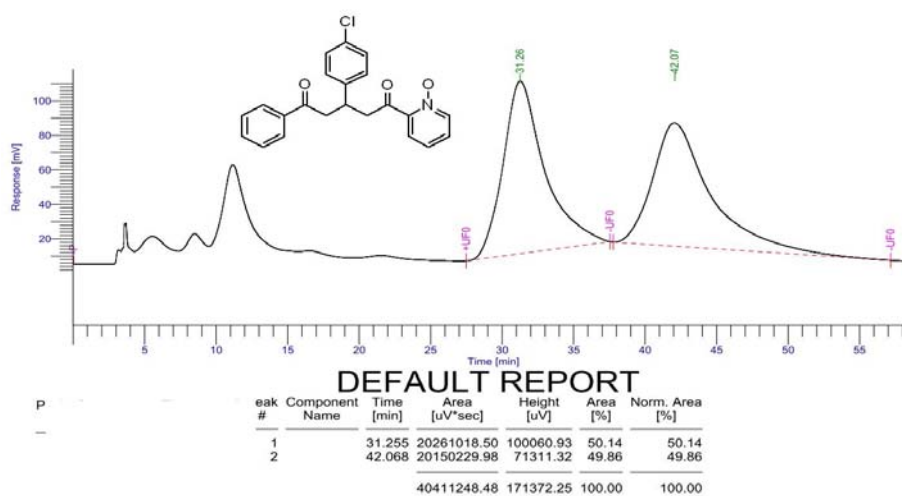

HPLC chromatogram of compound **4d** (racemic)

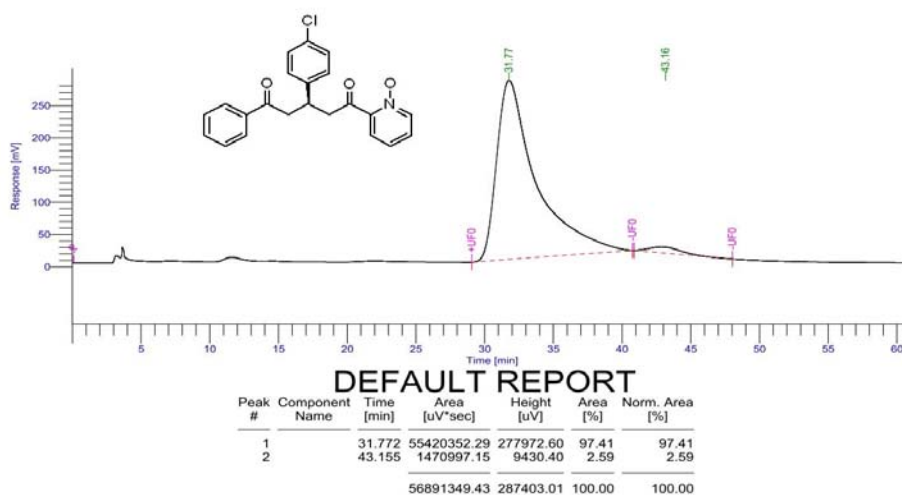

HPLC chromatogram of compound **4d** (chiral)

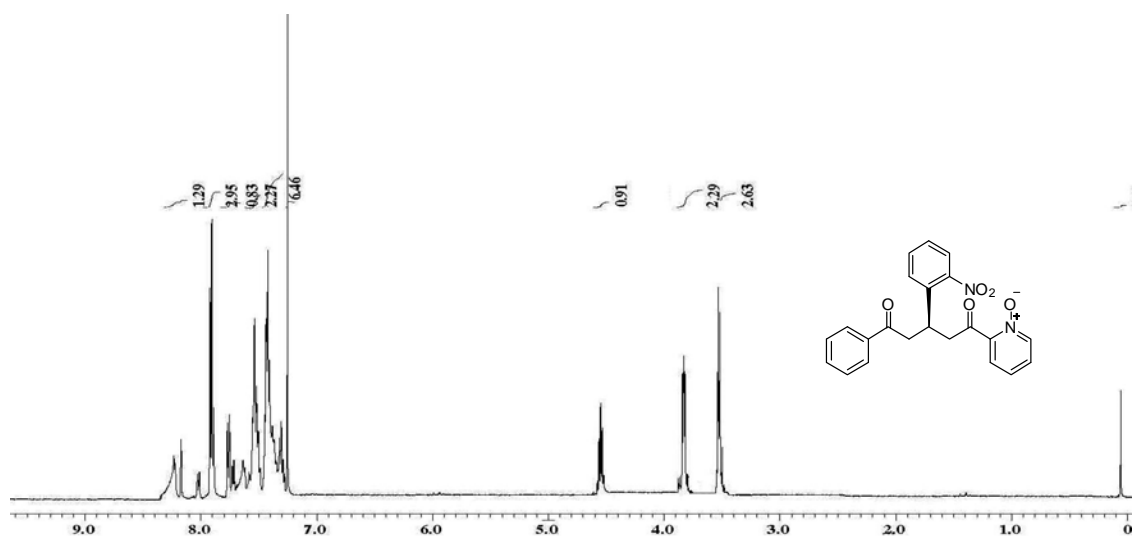

500 MHz  $^1\text{H}$  NMR spectra of compound **4e** in  $\text{CDCl}_3$

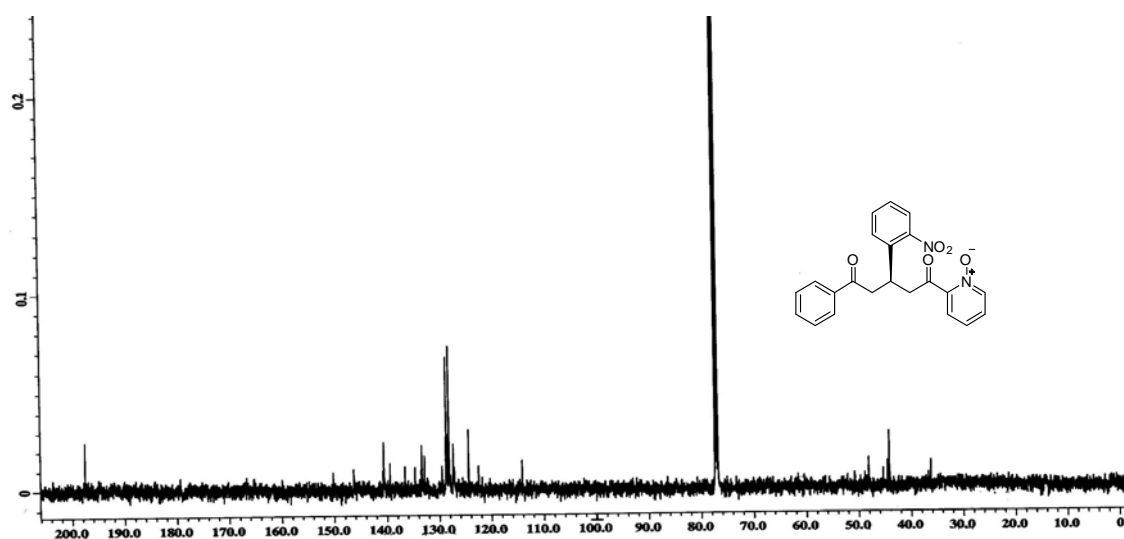

125 MHz  $^{13}\text{C}$  NMR spectra of compound **4e** in  $\text{CDCl}_3$

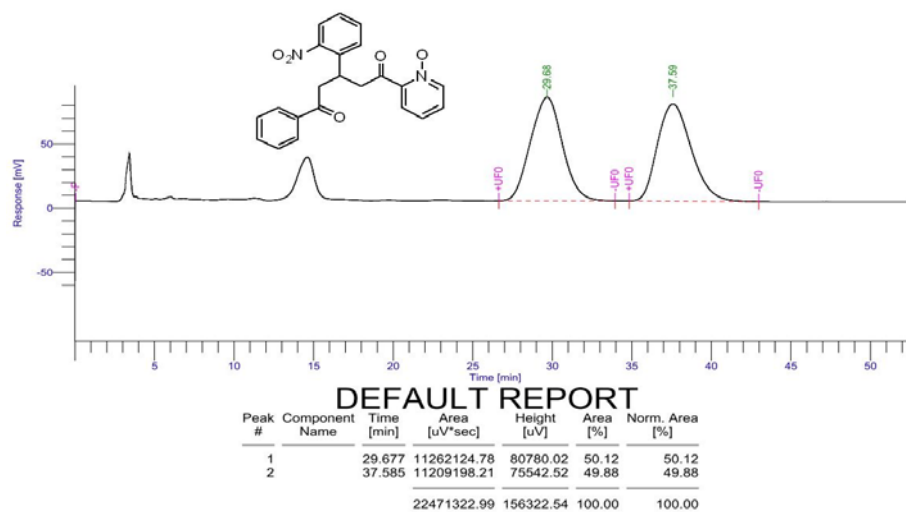

HPLC chromatogram of compound **4e** (racemic)

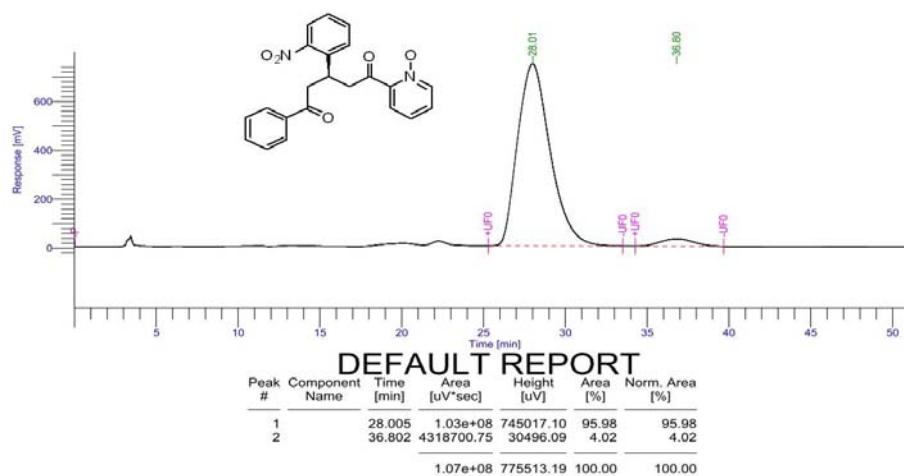

HPLC chromatogram of compound **4e** (chiral)

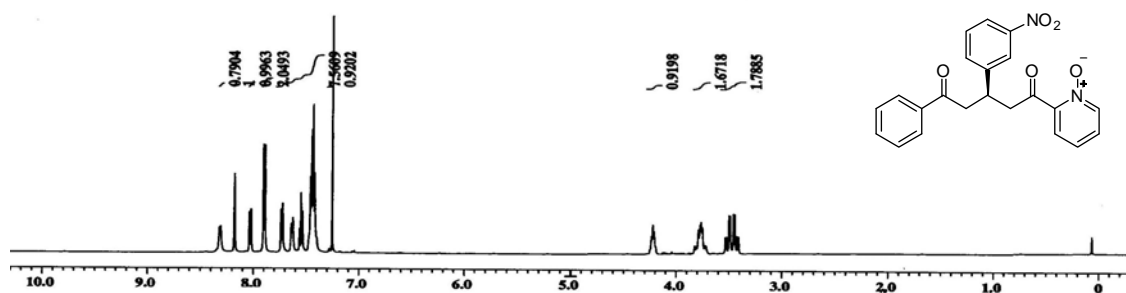

500 MHz  $^1\text{H}$  NMR spectra of compound **4f** in  $\text{CDCl}_3$

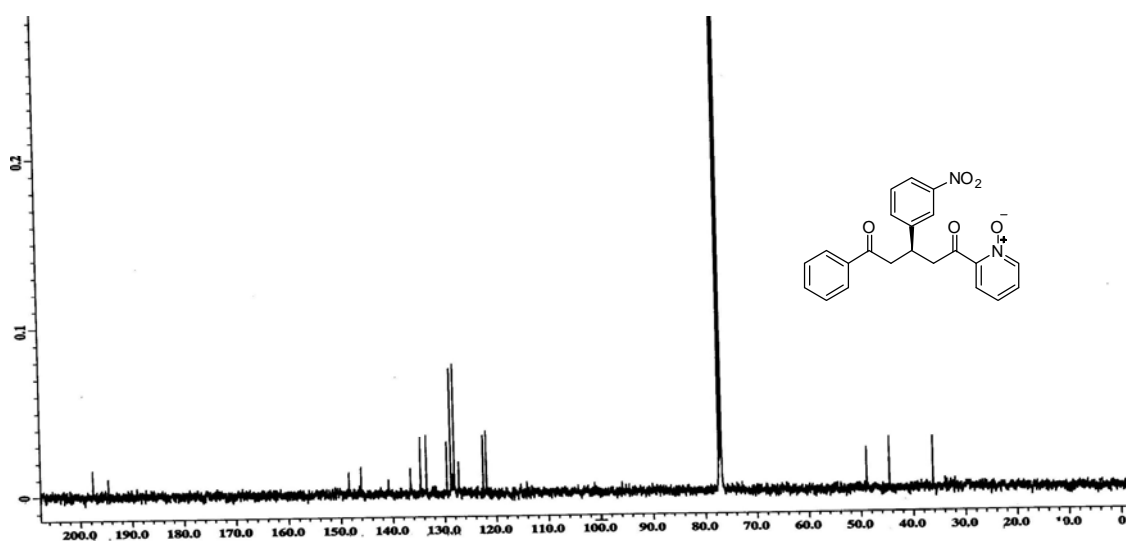

125 MHz  $^{13}\text{C}$  NMR spectra of compound **4f** in  $\text{CDCl}_3$

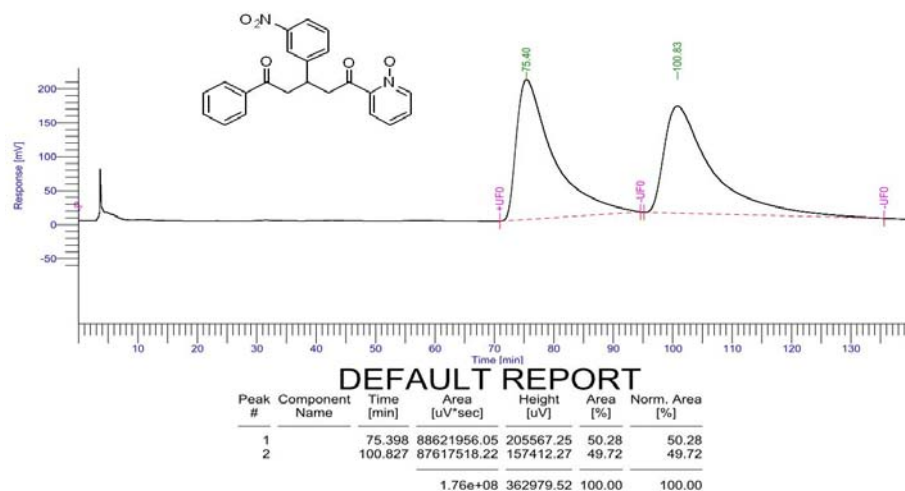

HPLC chromatogram of compound **4f** (racemic)

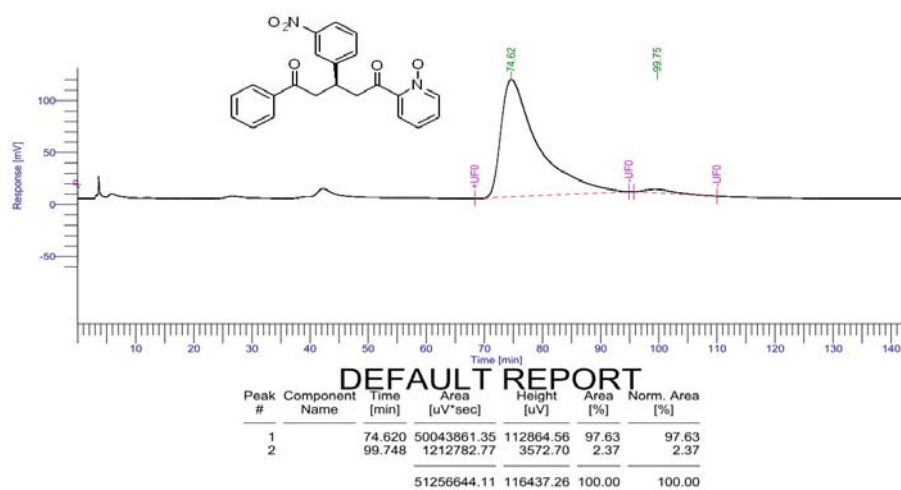

HPLC chromatogram of compound **4f** (chiral)

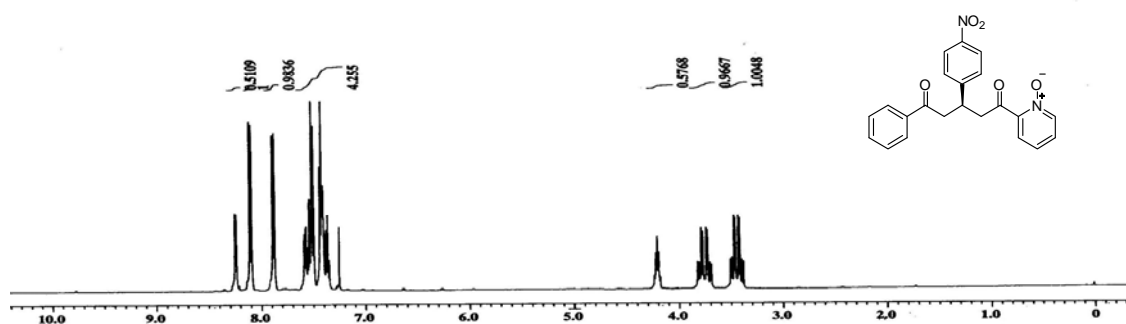

500 MHz  $^1\text{H}$  NMR spectra of compound **4g** in  $\text{CDCl}_3$

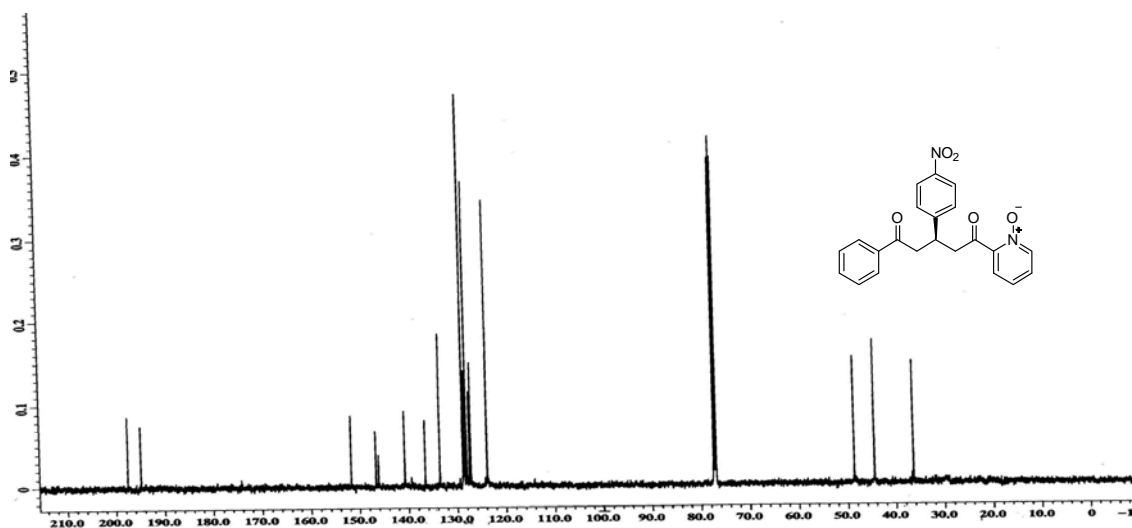

125 MHz  $^{13}\text{C}$  NMR spectra of compound **4g** in  $\text{CDCl}_3$



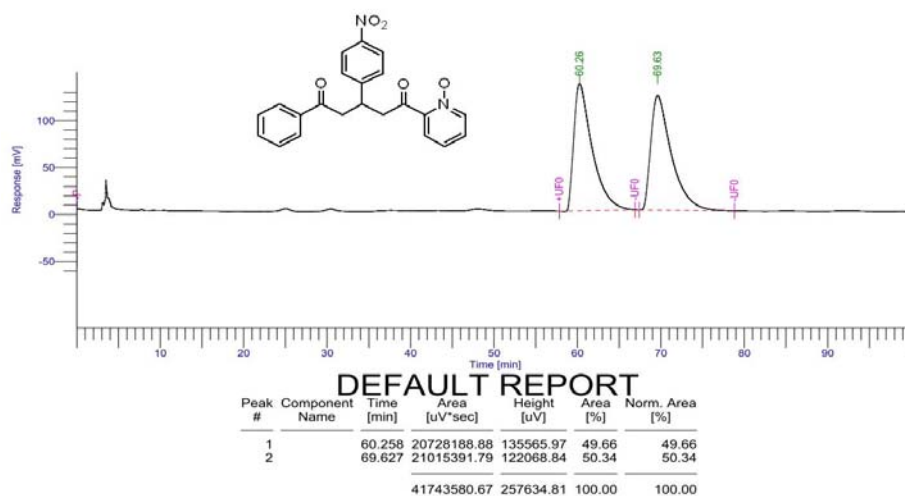

HPLC chromatogram of compound **4g** (racemic)

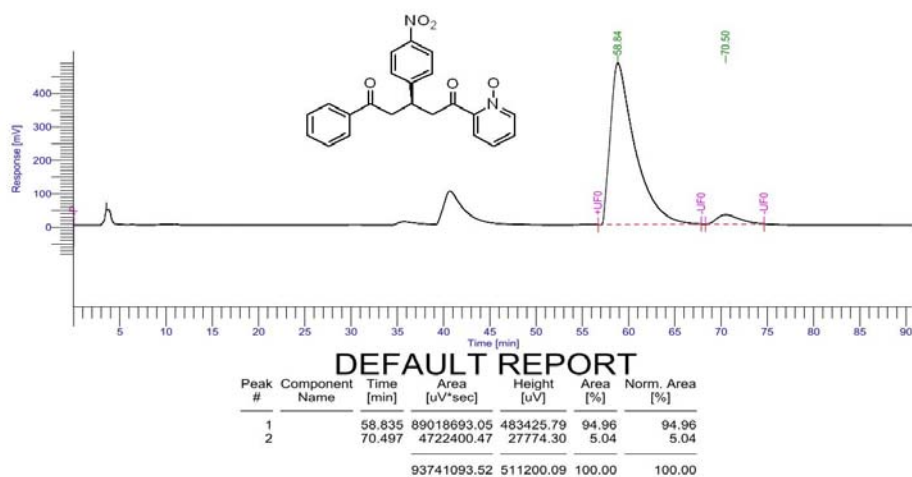

HPLC chromatogram of compound **4g** (chiral)

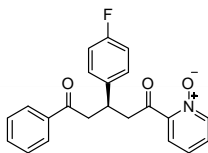500 MHz <sup>1</sup>H NMR spectra of compound **4h** in CDCl<sub>3</sub>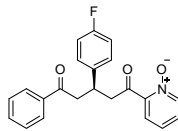

125 MHz  $^{13}\text{C}$  NMR spectra of compound **4h** in  $\text{CDCl}_3$

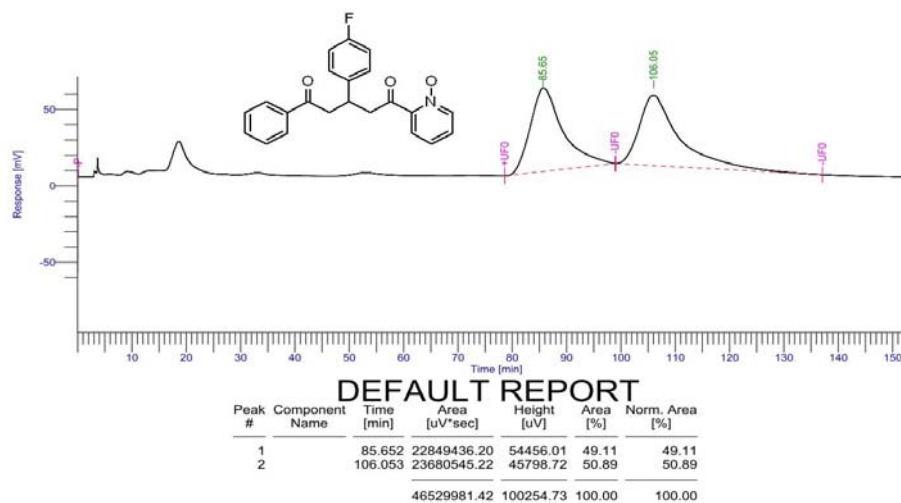

HPLC chromatogram of compound **4h** (racemic)

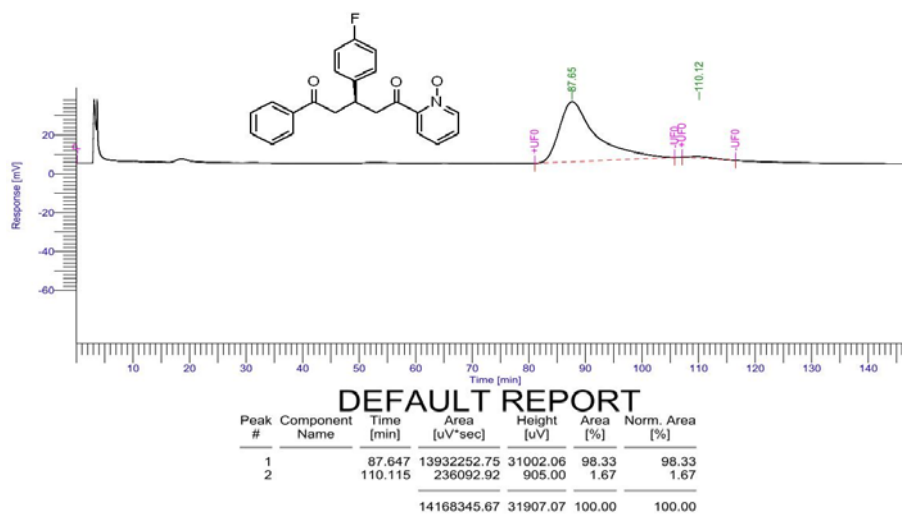

HPLC chromatogram of compound **4h** (chiral)

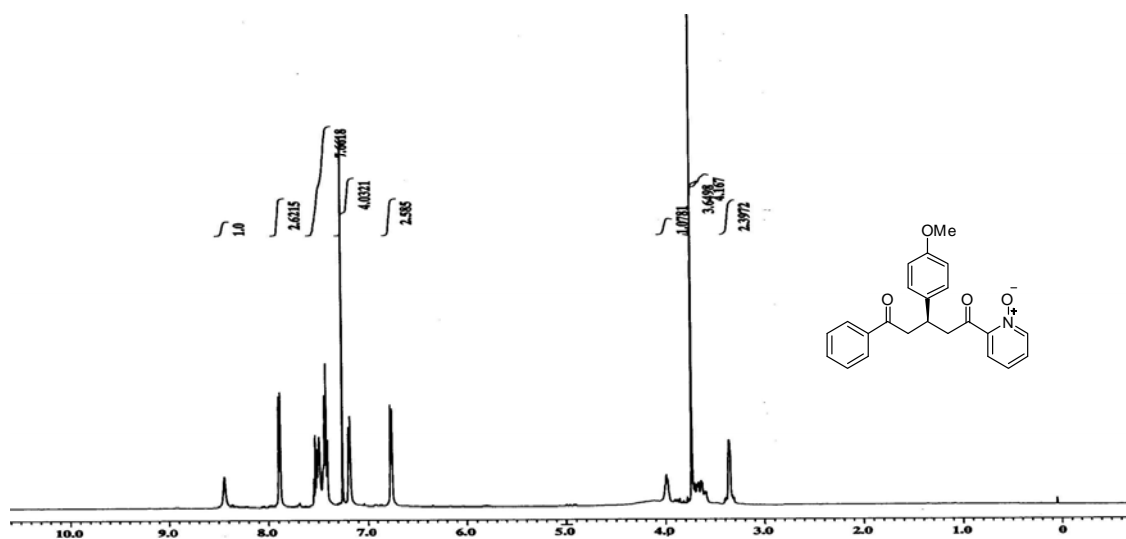

500 MHz  $^1\text{H}$  NMR spectra of compound **4i** in  $\text{CDCl}_3$

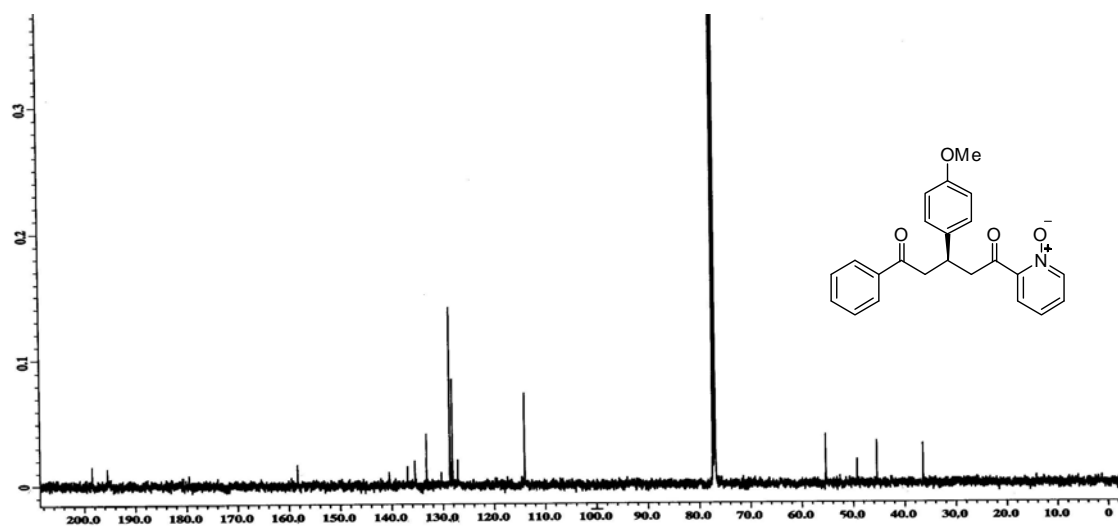

125 MHz  $^{13}\text{C}$  NMR spectra of compound **4i** in  $\text{CDCl}_3$

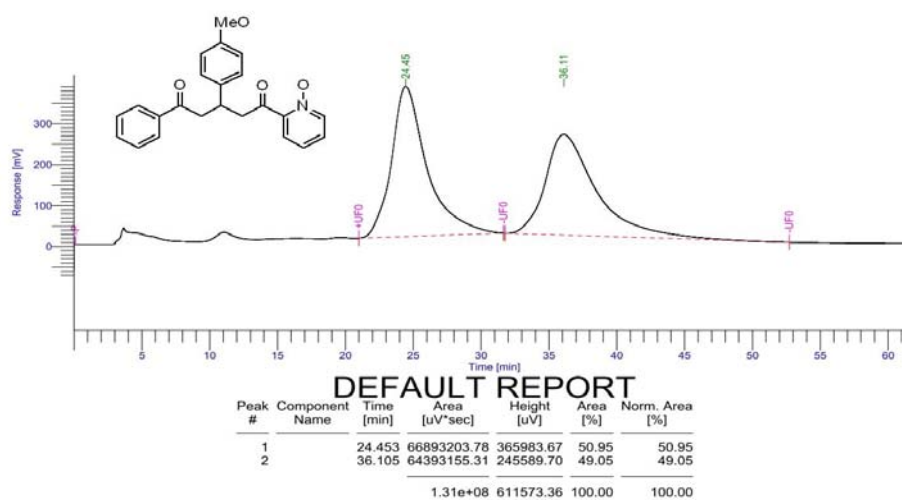

HPLC chromatogram of compound **4i** (racemic)

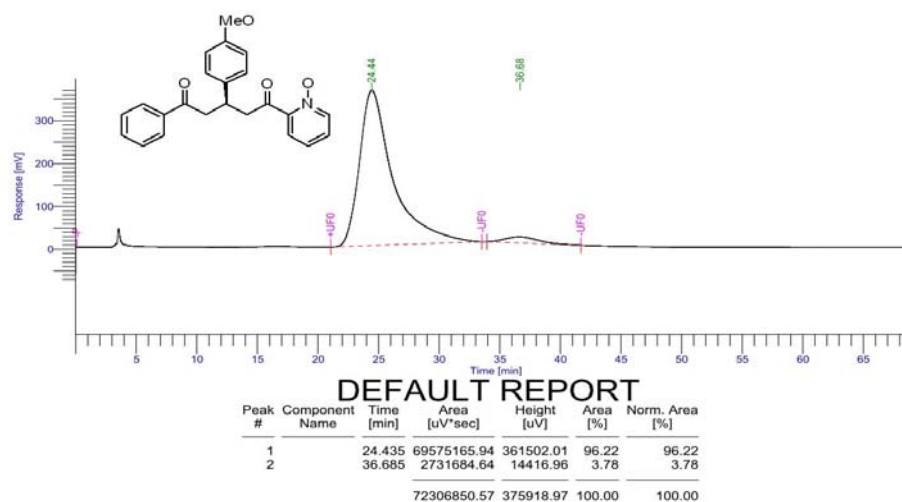

HPLC chromatogram of compound **4i** (chiral)



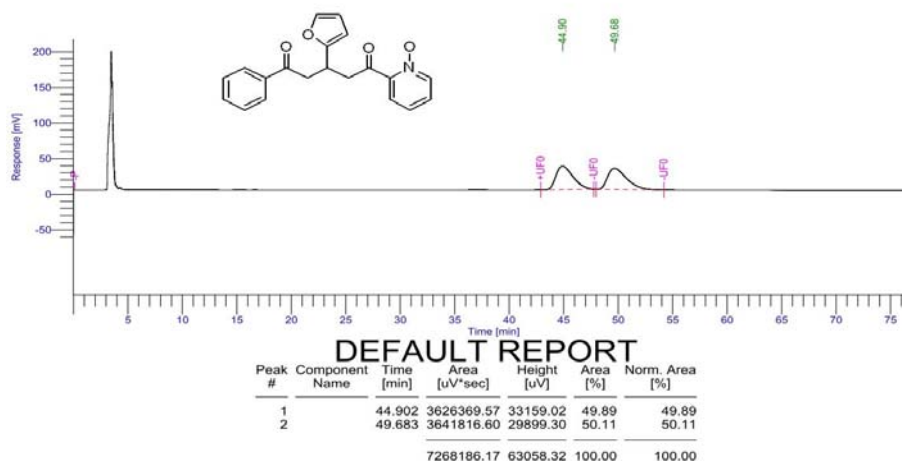

HPLC chromatogram of compound **4j** (racemic)

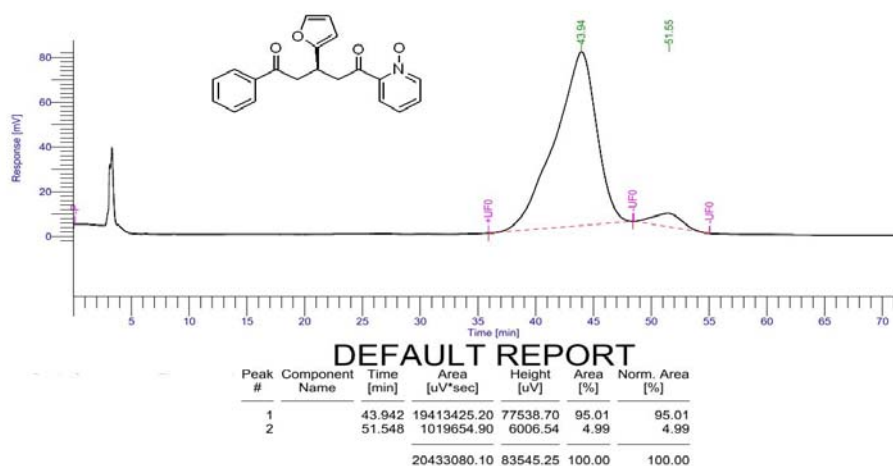

HPLC chromatogram of compound **4j** (chiral)

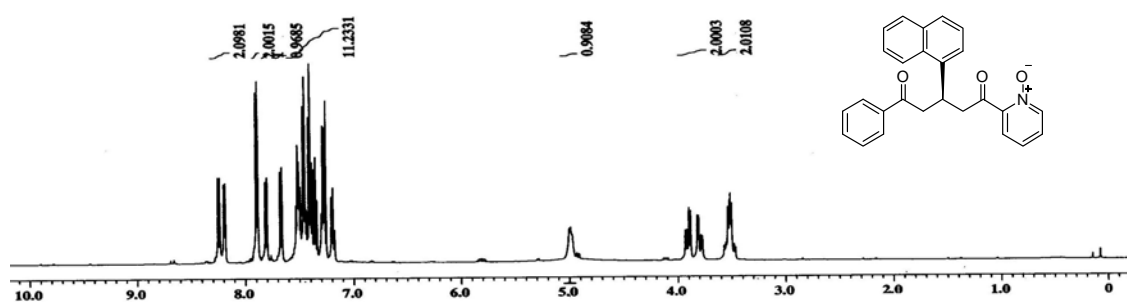

500 MHz  $^1\text{H}$  NMR spectra of compound **4k** in  $\text{CDCl}_3$

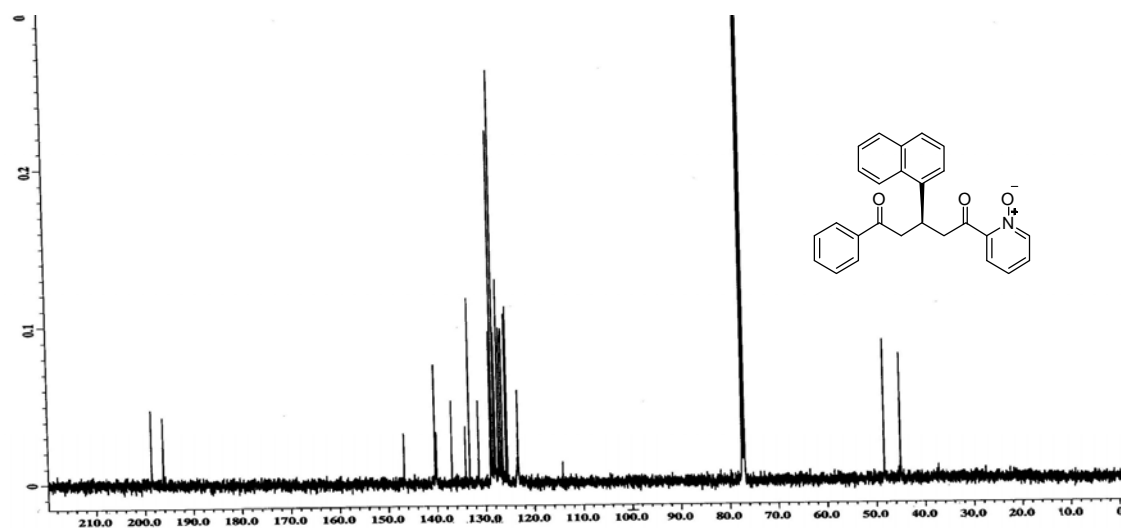

125 MHz  $^{13}\text{C}$  NMR spectra of compound **4k** in  $\text{CDCl}_3$



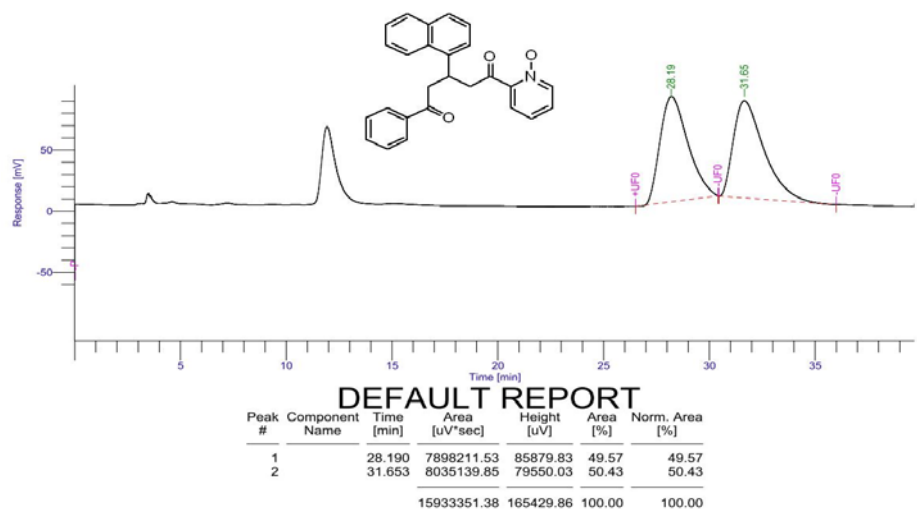

HPLC chromatogram of compound **4k** (racemic)

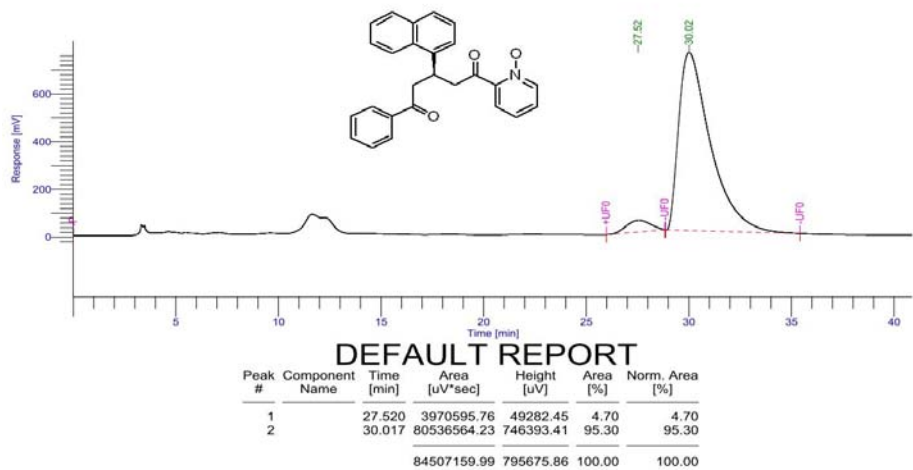

HPLC chromatogram of compound **4k** (chiral)

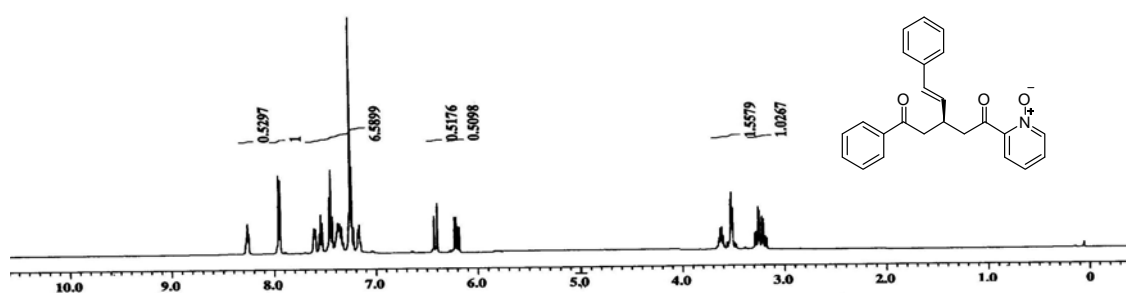

500 MHz <sup>1</sup>H NMR spectra of compound **4l** in CDCl<sub>3</sub>

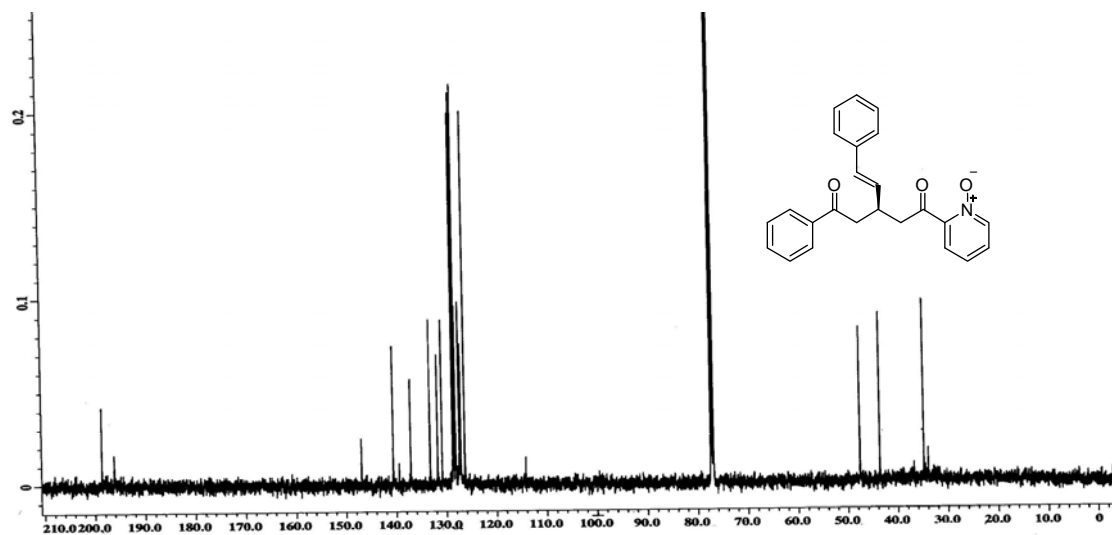

125 MHz <sup>13</sup>C NMR spectra of compound **4l** in CDCl<sub>3</sub>

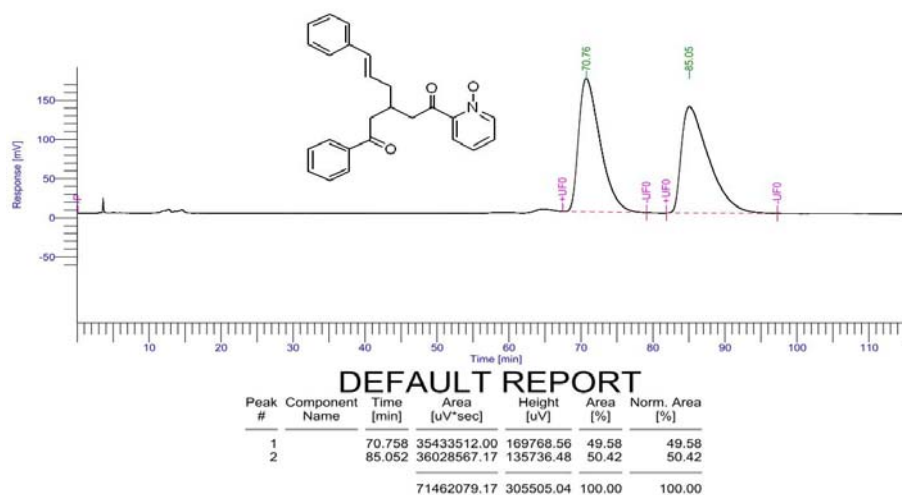

HPLC chromatogram of compound **4I** (racemic)

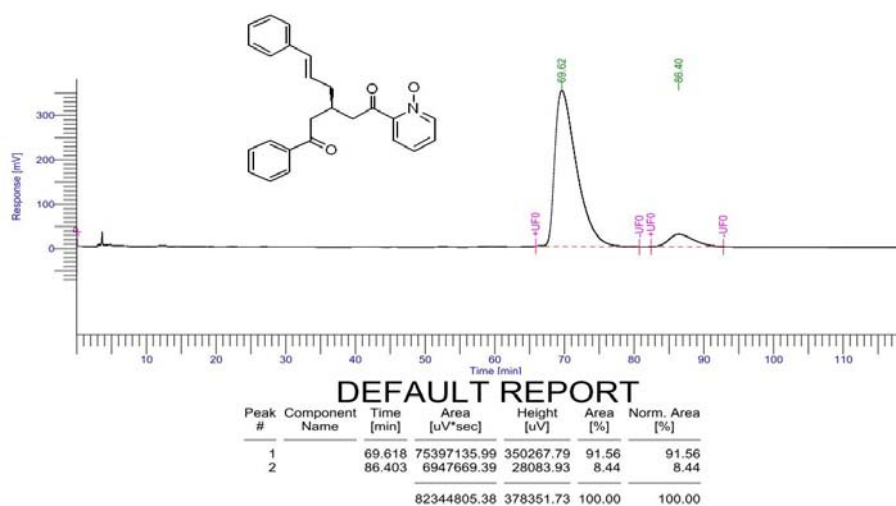

HPLC chromatogram of compound **4I** (chiral)

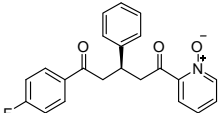

500 MHz  $^1\text{H}$  NMR spectra of compound **4m** in  $\text{CDCl}_3$

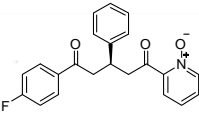

125 MHz  $^{13}\text{C}$  NMR spectra of compound **4m** in  $\text{CDCl}_3$

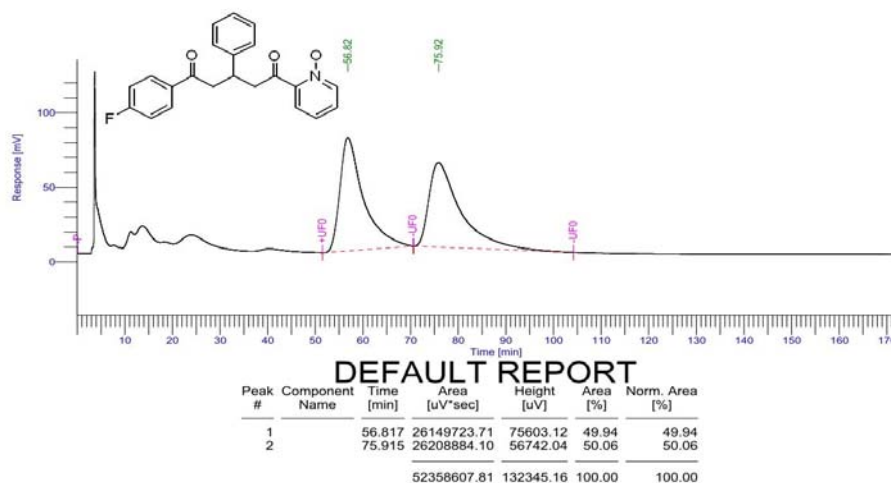

HPLC chromatogram of compound **4m** (racemic)

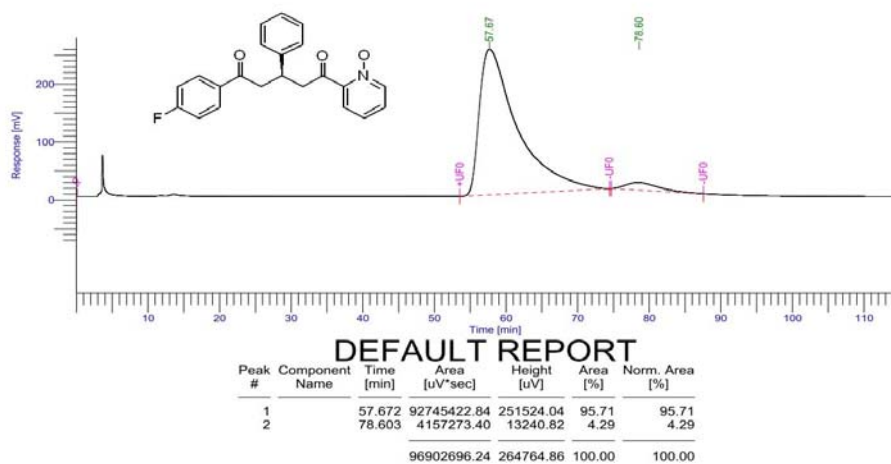

HPLC chromatogram of compound **4m** (chiral)

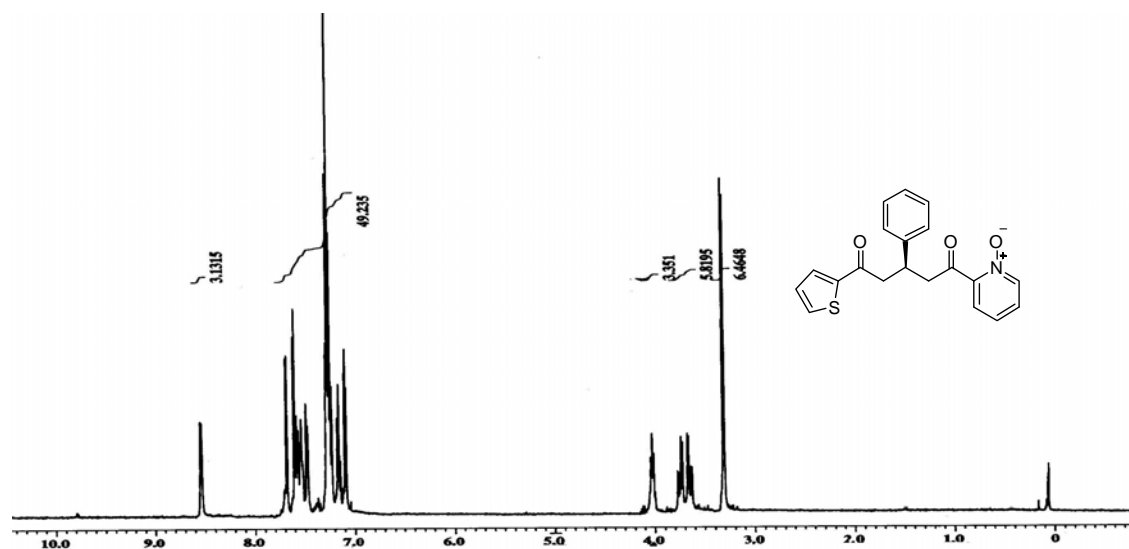

500 MHz  $^1\text{H}$  NMR spectra of compound **4n** in  $\text{CDCl}_3$

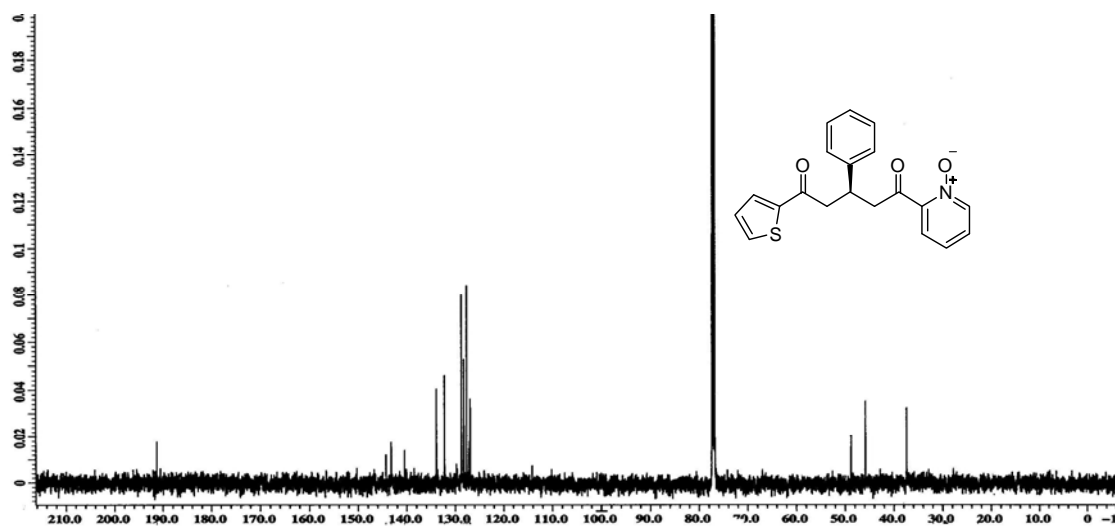

125 MHz  $^{13}\text{C}$  NMR spectra of compound **4n** in  $\text{CDCl}_3$

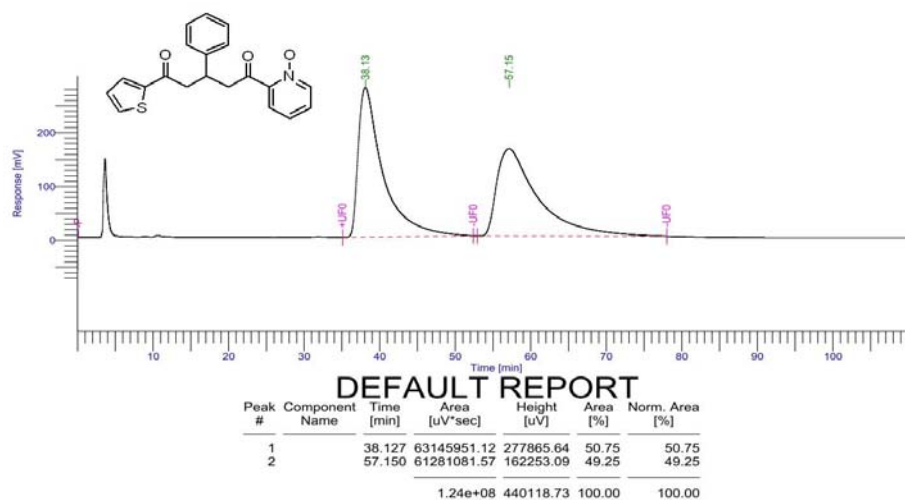

HPLC chromatogram of compound **4n** (racemic)

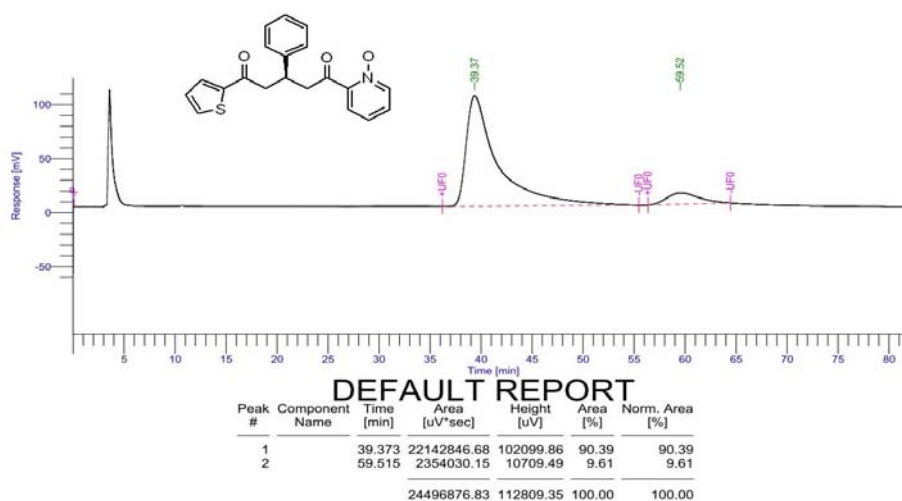

# HPLC chromatogram of compound **4n** (chiral)

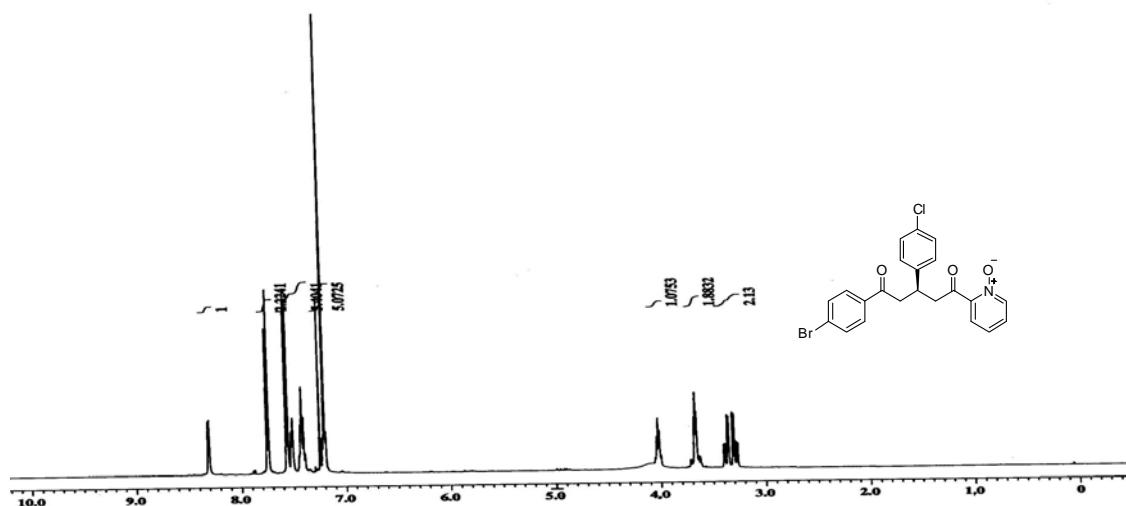

# 500 MHz $^1\text{H}$ NMR spectra of compound **4o** in $\text{CDCl}_3$

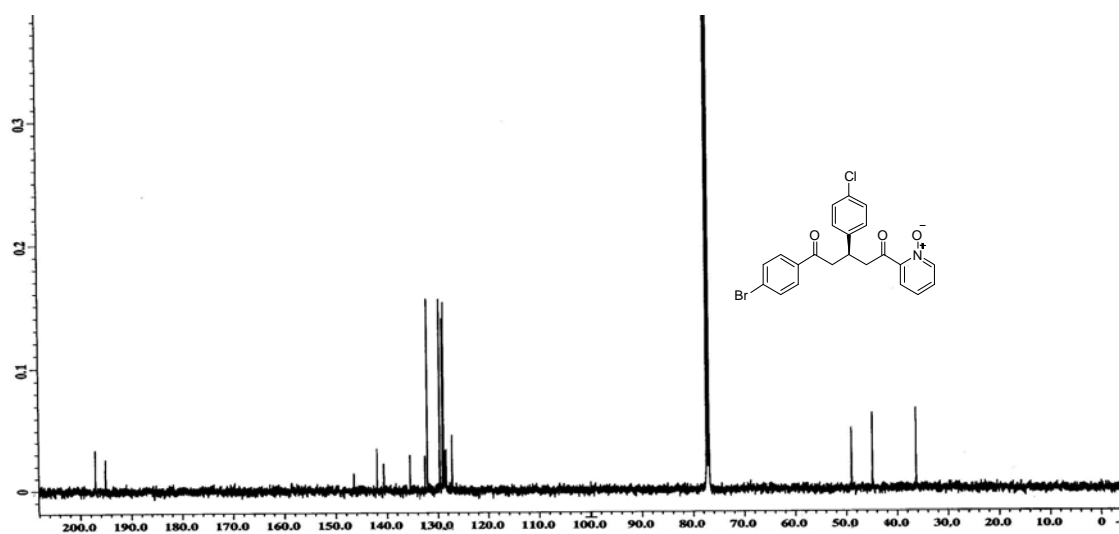



125 MHz  $^{13}\text{C}$  NMR spectra of compound **4o** in  $\text{CDCl}_3$

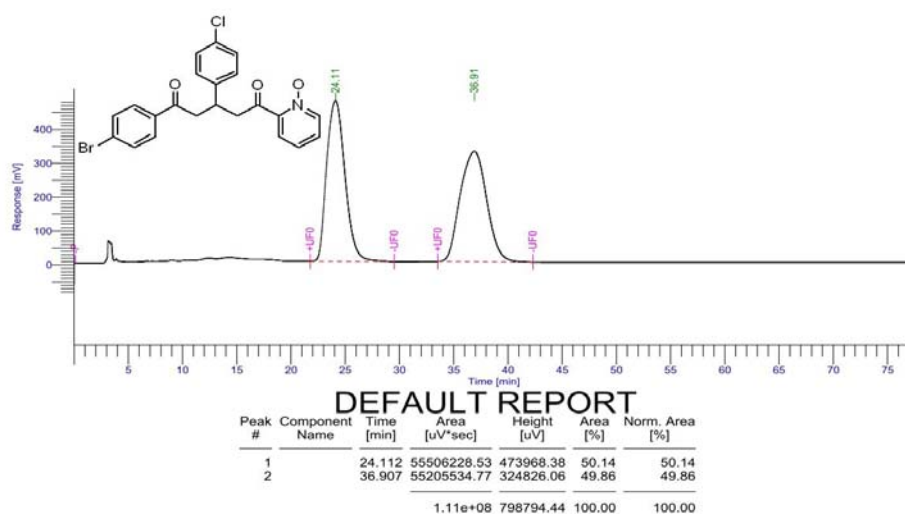

HPLC chromatogram of compound **4o** (racemic)

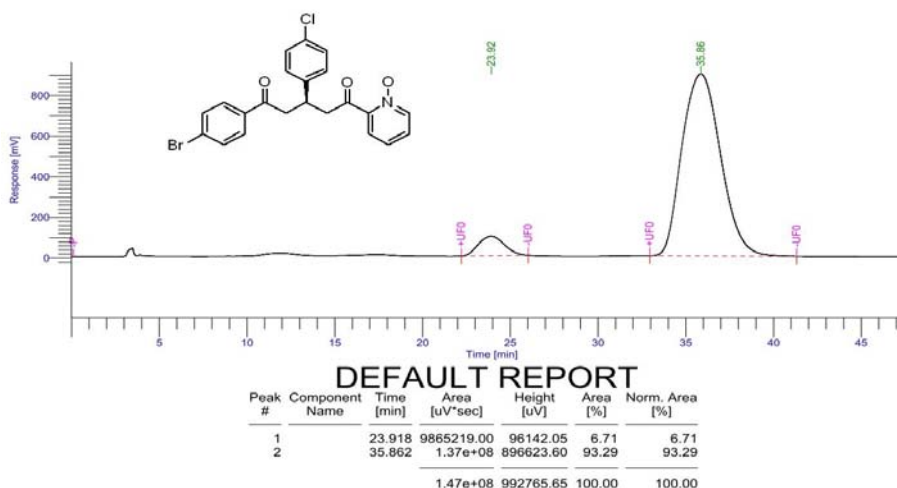

HPLC chromatogram of compound **4o** (chiral)

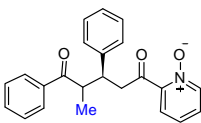

500 MHz  $^1\text{H}$  NMR spectra of compound **6a** in  $\text{CDCl}_3$

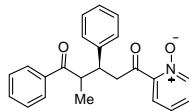

125 MHz <sup>13</sup>C NMR spectra of compound **6a** in CDCl<sub>3</sub>

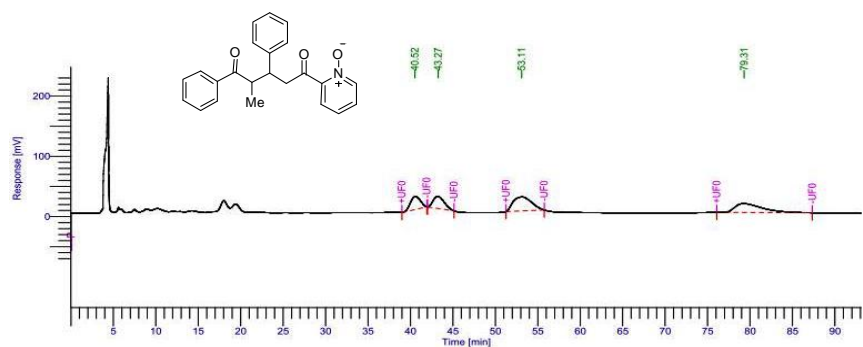

DEFAULT REPORT

| Peak # | Component Name | Time [min] | Area [uV*sec] | Height [uV] | Area [%] | Norm. Area [%] |
|--------|----------------|------------|---------------|-------------|----------|----------------|
| 1      |                | 40.523     | 1758573.52    | 21465.68    | 16.88    | 16.88          |
| 2      |                | 43.265     | 1856646.01    | 20246.87    | 17.82    | 17.82          |
| 3      |                | 53.105     | 3500593.93    | 23323.53    | 33.60    | 33.60          |
| 4      |                | 79.310     | 3302529.97    | 14839.45    | 31.70    | 31.70          |
|        |                |            | 10418343.43   | 79875.53    | 100.00   | 100.00         |

HPLC chromatogram of compound **6a** (racemic)

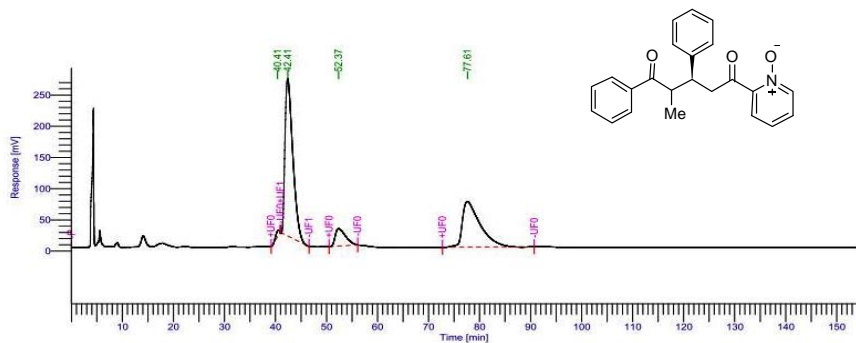

DEFAULT REPORT

| Peak # | Component Name | Time [min] | Area [uV*sec] | Height [uV] | Area [%] | Norm. Area [%] |
|--------|----------------|------------|---------------|-------------|----------|----------------|
| 1      |                | 40.407     | 416885.97     | 9327.13     | 0.85     | 0.85           |
| 2      |                | 42.410     | 26901925.97   | 251944.73   | 55.06    | 55.06          |
| 3      |                | 52.367     | 3836037.89    | 28071.65    | 8.06     | 8.06           |
| 4      |                | 77.607     | 17600318.97   | 73193.34    | 36.03    | 36.03          |
|        |                |            | 48855168.80   | 362536.85   | 100.00   | 100.00         |

The <sup>13</sup>C NMR spectrum shows peaks in the aromatic region (120-145 ppm) and aliphatic region (20-35 ppm). The chemical structure of compound 10 is shown as an inset: Cc1ccccc1C(=O)[C@H](c2ccccc2Cl)CC(=O)c3cc[n+](O-)[c+]3. The structure features a central chiral carbon bonded to a phenyl ring, a benzoyl group, a 2-chlorophenyl group, and a 4-pyridylmethyl group.

125 MHz  $^{13}\text{C}$  NMR spectra of compound **6b** in  $\text{CDCl}_3$

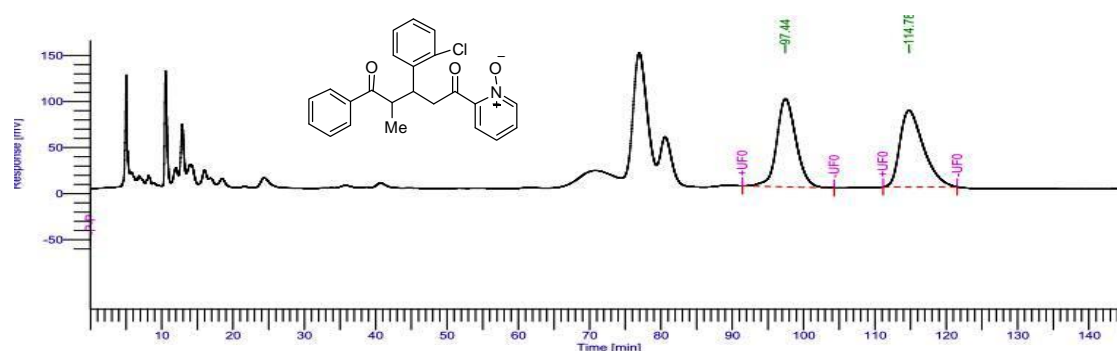

DEFAULT REPORT

| Peak # | Component Name | Time [min] | Area [uV*sec] | Height [uV] | Area [%] | Norm. Area [%] |
|--------|----------------|------------|---------------|-------------|----------|----------------|
| 1      |                | 97.440     | 17903400.37   | 95489.91    | 48.41    | 48.41          |
| 2      |                | 114.783    | 19078413.84   | 82948.09    | 51.59    | 51.59          |
|        |                |            | 36981814.21   | 178438.00   | 100.00   | 100.00         |

HPLC chromatogram of compound **6b** (racemic)

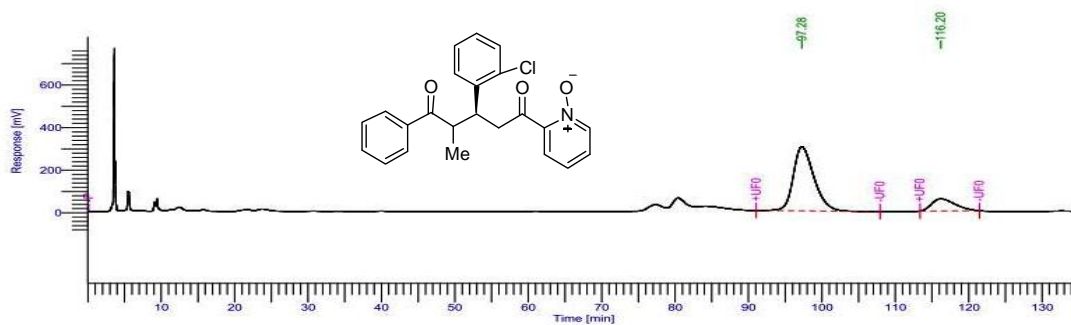

DEFAULT REPORT

| Peak # | Component Name | Time [min] | Area [uV*sec] | Height [uV] | Area [%] | Norm. Area [%] |
|--------|----------------|------------|---------------|-------------|----------|----------------|
| 1      |                | 97.277     | 58976431.19   | 300994.55   | 82.54    | 82.54          |
| 2      |                | 116.197    | 12476025.96   | 56492.45    | 17.46    | 17.46          |
|        |                |            | 71452457.15   | 357487.00   | 100.00   | 100.00         |

HPLC chromatogram of compound **6b** (Chiral)

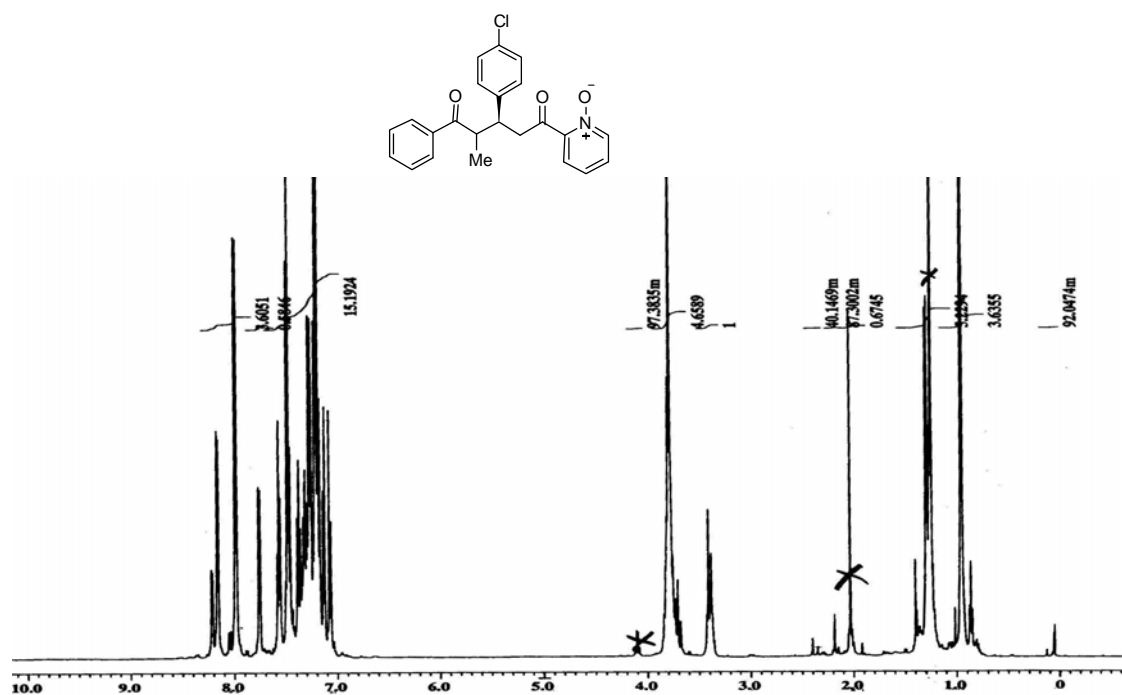

500 MHz  $^1\text{H}$  NMR spectra of compound **6c** in  $\text{CDCl}_3$

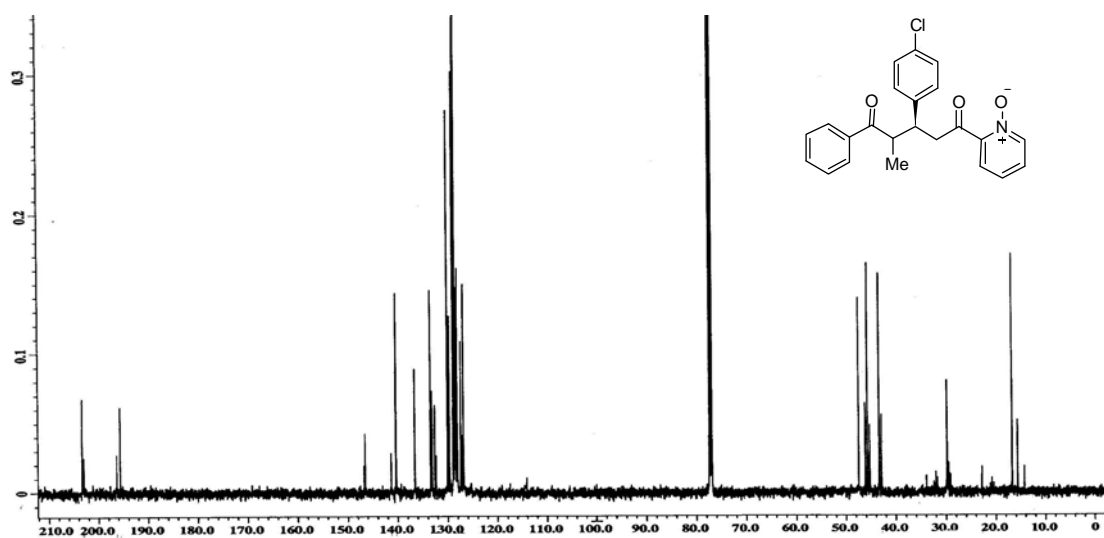

125 MHz  $^{13}\text{C}$  NMR spectra of compound **6c** in  $\text{CDCl}_3$

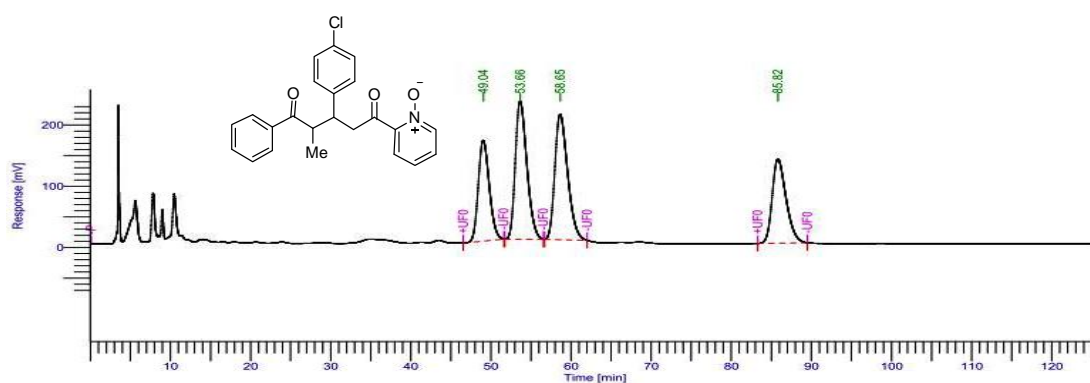

DEFAULT REPORT

| Peak # | Component Name | Time [min] | Area [uV*sec] | Height [uV] | Area [%] | Norm. Area [%] |
|--------|----------------|------------|---------------|-------------|----------|----------------|
| 1      |                | 49.043     | 15702597.14   | 164674.63   | 20.20    | 20.20          |
| 2      |                | 53.665     | 22700604.33   | 225703.42   | 29.20    | 29.20          |
| 3      |                | 58.645     | 22768215.17   | 205090.92   | 29.29    | 29.29          |
| 4      |                | 85.823     | 16557328.80   | 137817.15   | 21.30    | 21.30          |
|        |                |            | 77728745.44   | 733286.12   | 100.00   | 100.00         |

HPLC chromatogram of compound **6c** (racemic)

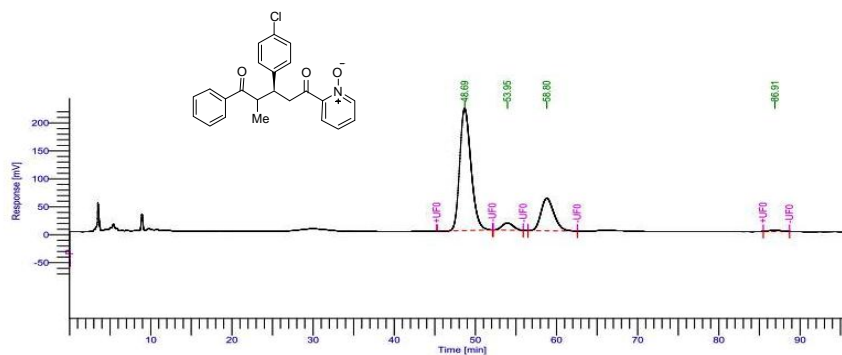

DEFAULT REPORT

| Peak # | Component Name | Time [min] | Area [uV*sec] | Height [uV] | Area [%] | Norm. Area [%] |
|--------|----------------|------------|---------------|-------------|----------|----------------|
| 1      |                | 48.688     | 21105204.70   | 218810.65   | 72.56    | 72.56          |
| 2      |                | 53.952     | 1240515.53    | 13078.90    | 4.27     | 4.27           |
| 3      |                | 58.798     | 6521909.26    | 58187.31    | 22.42    | 22.42          |
| 4      |                | 86.905     | 217246.20     | 2116.38     | 0.75     | 0.75           |
|        |                |            | 29084875.69   | 292193.24   | 100.00   | 100.00         |

HPLC chromatogram of compound **6c** (Chiral)

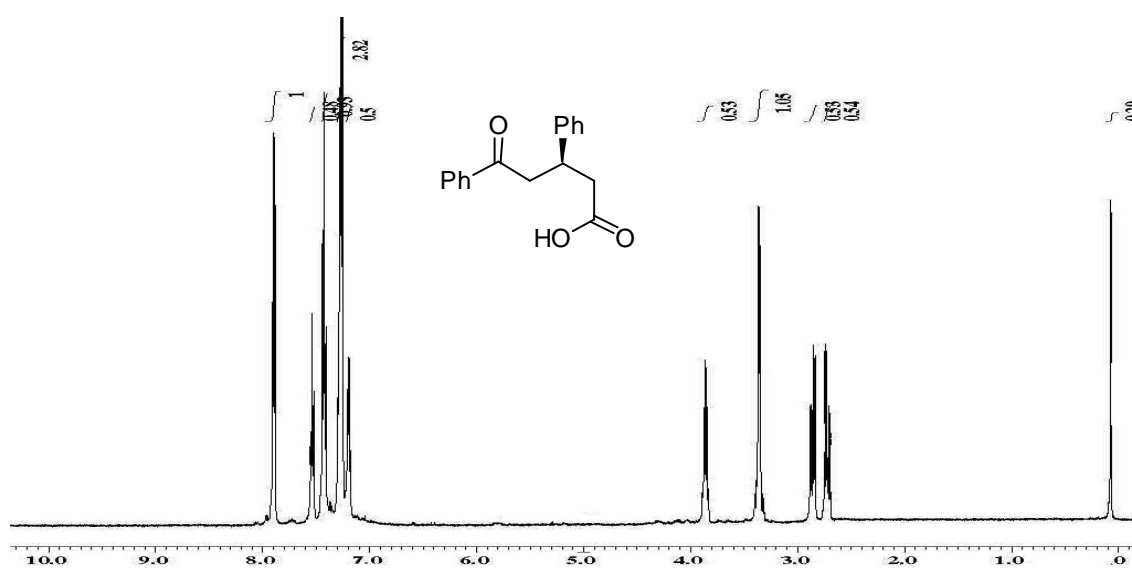

500 MHz  $^1\text{H}$  NMR spectra of compound **7** in  $\text{CDCl}_3$

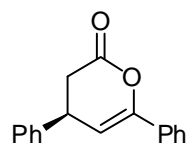



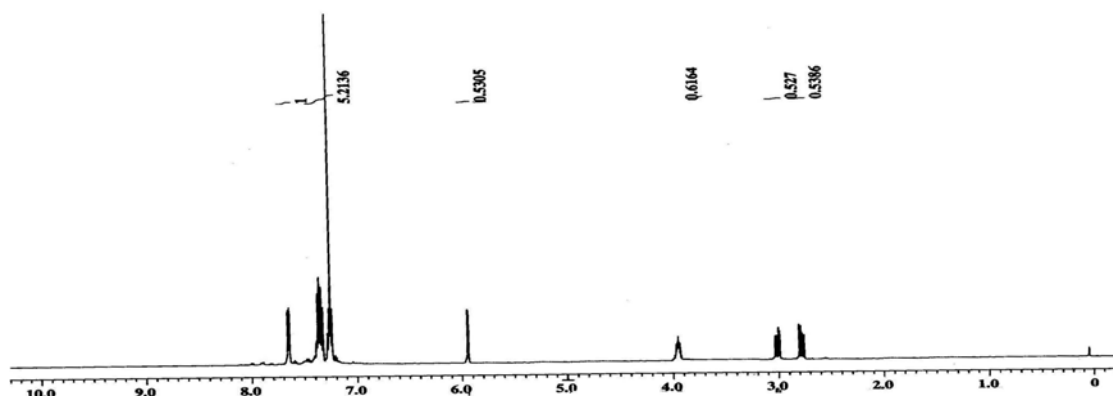

500 MHz  $^1\text{H}$  NMR spectra of compound **8** in  $\text{CDCl}_3$

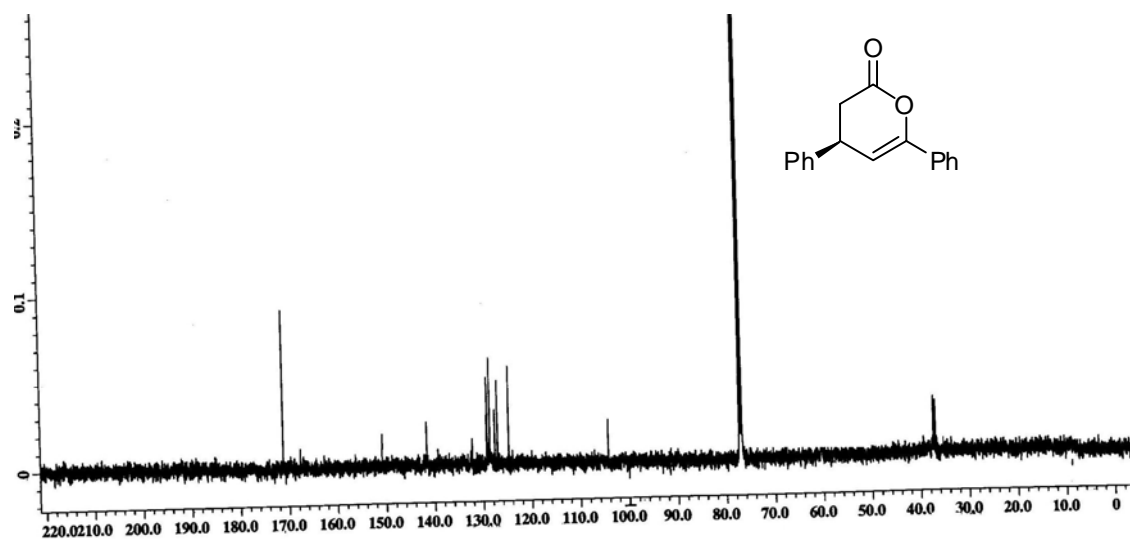

125 MHz  $^{13}\text{C}$  NMR spectra of compound **8** in  $\text{CDCl}_3$

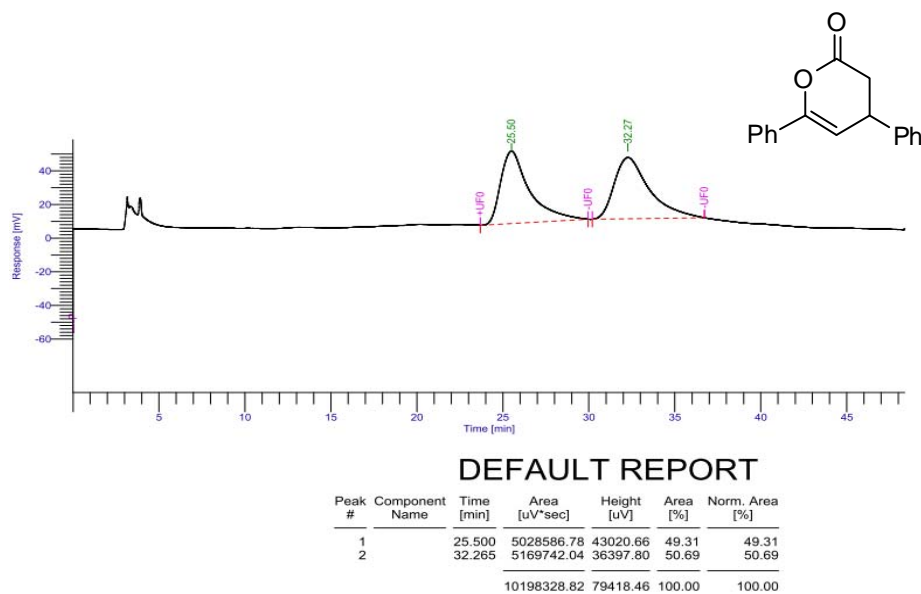

HPLC chromatogram of compound **8** (racemic)

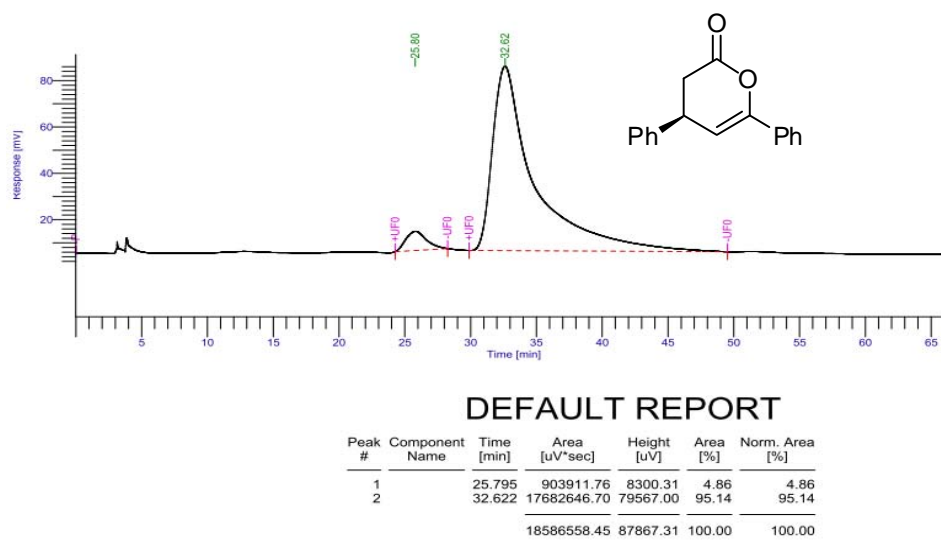

HPLC chromatogram of compound **8** (Chiral)

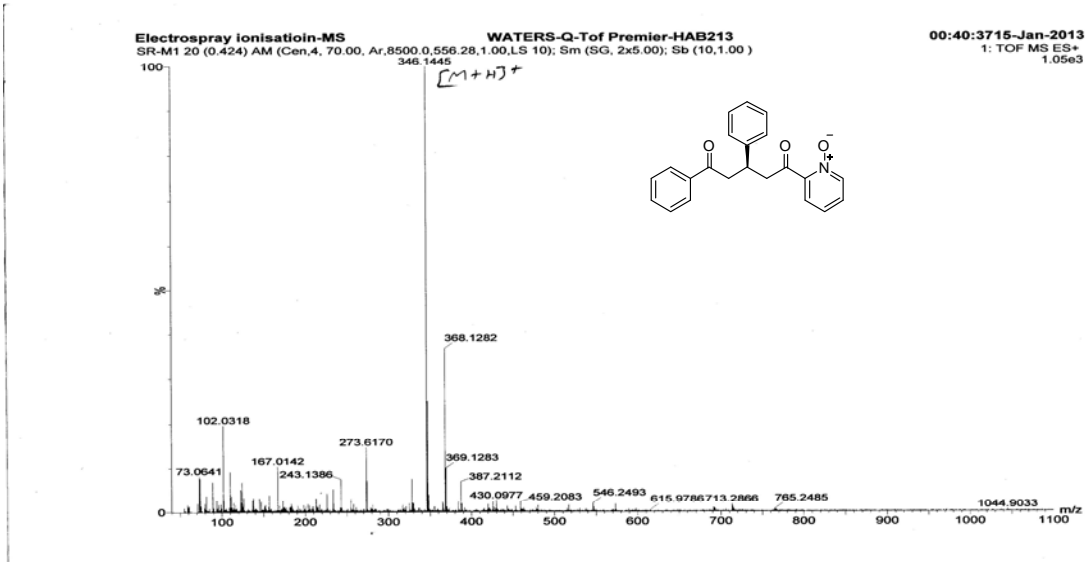

### Mass spectrum of compound 4a

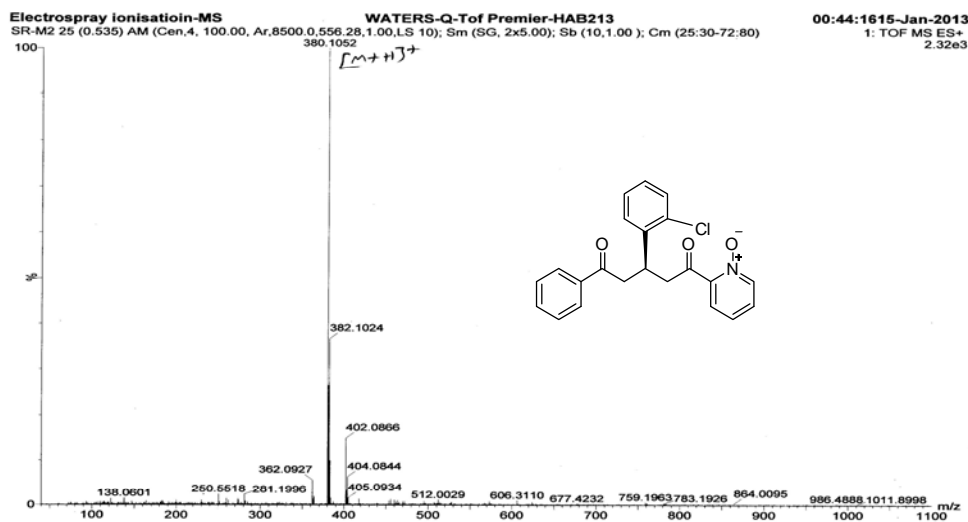

### Mass spectrum of compound 4b

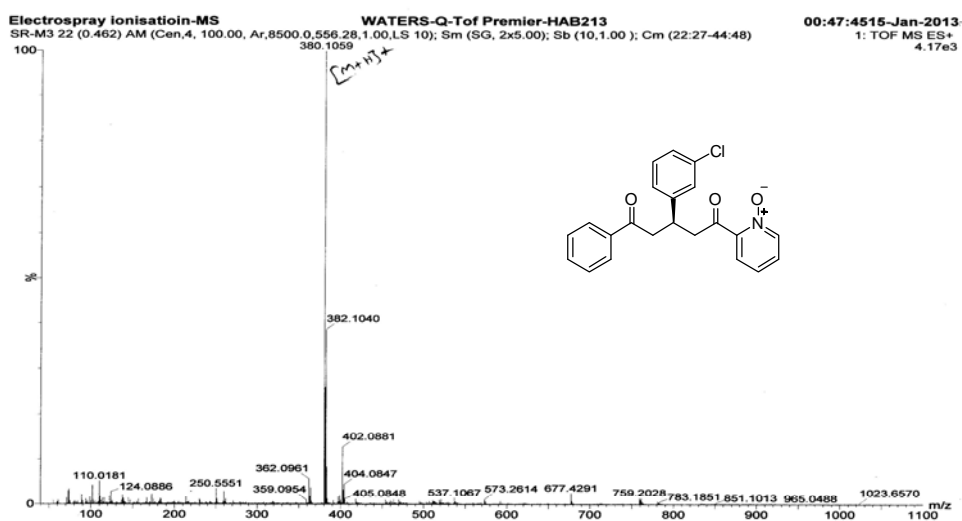

### Mass spectrum of compound 4c

S44

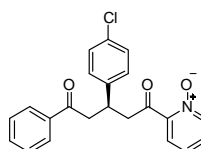

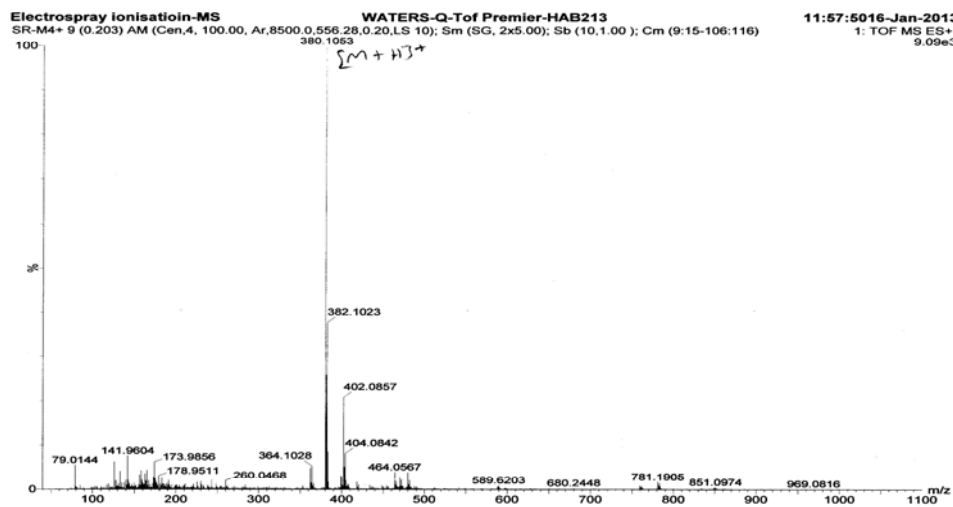

Mass spectrum of compound 4d

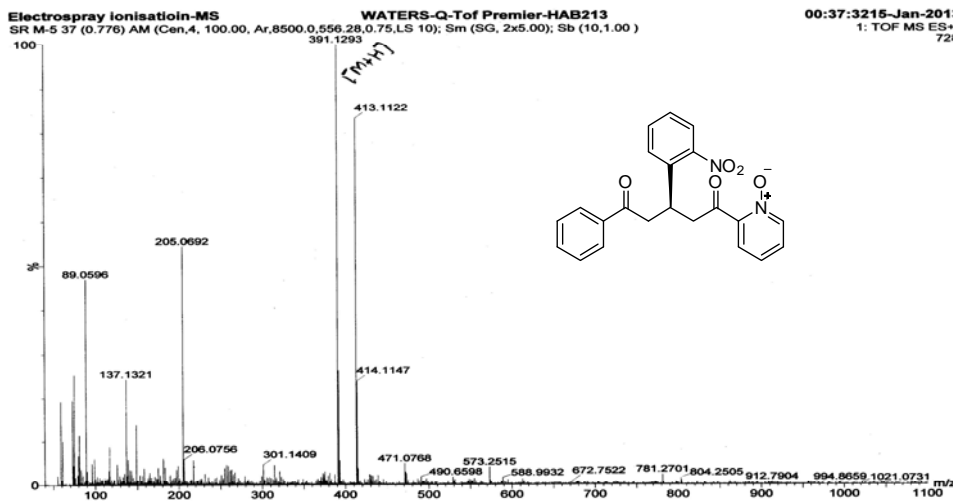

Mass spectrum of compound 4e

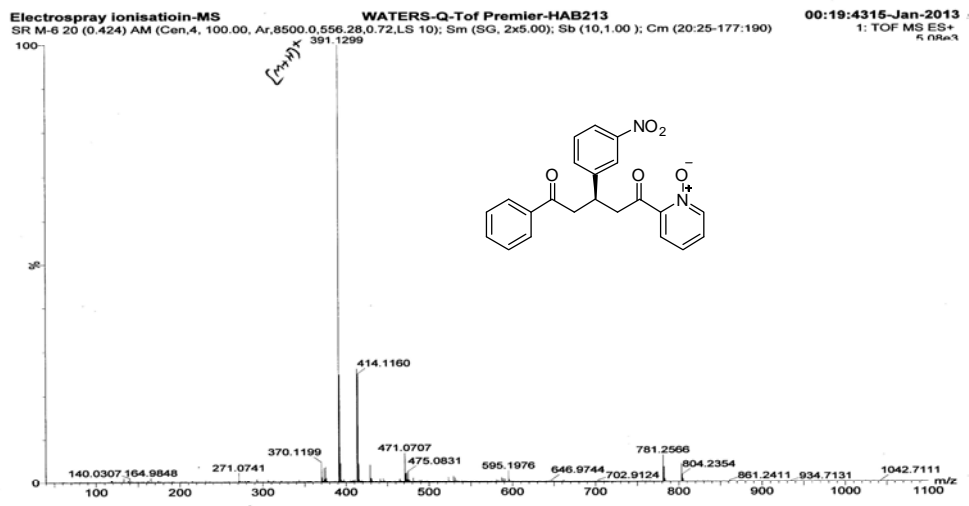

Mass spectrum of compound 4f

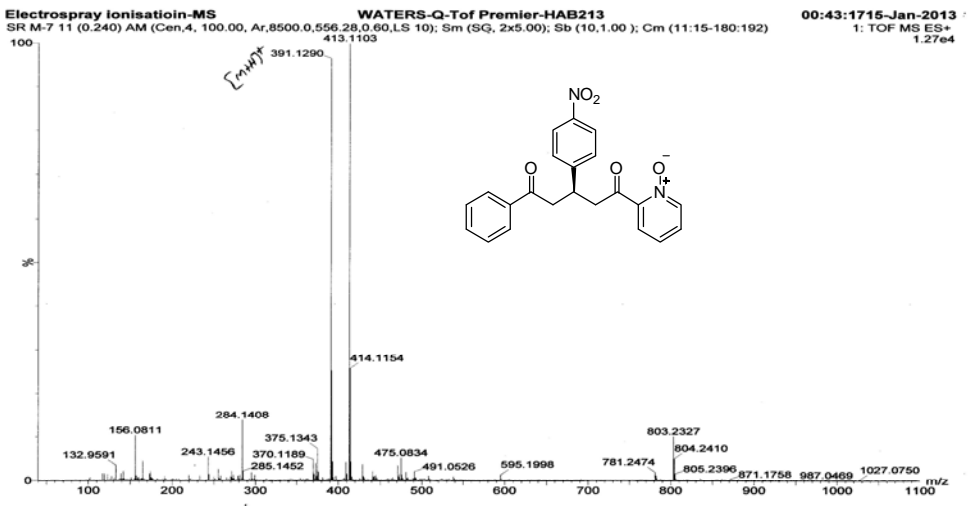

Mass spectrum of compound 4g

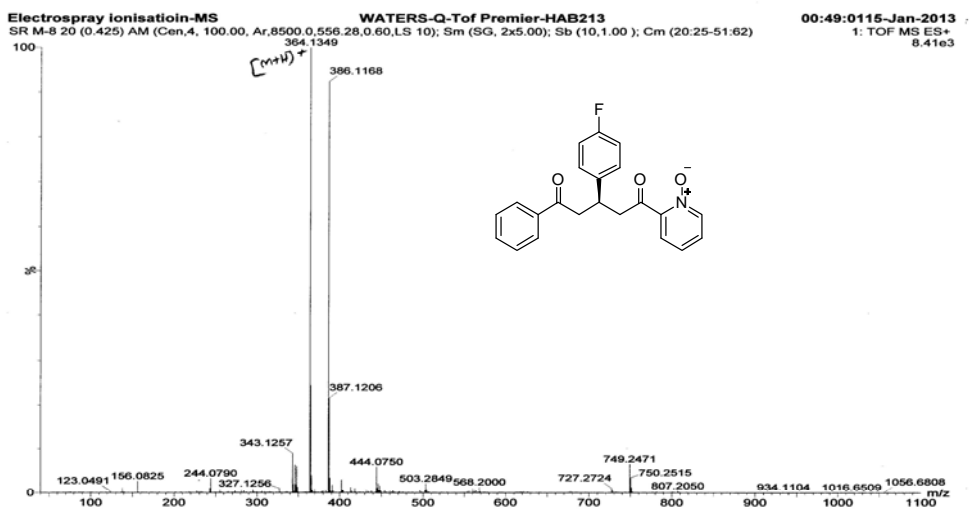

Mass spectrum of compound 4h

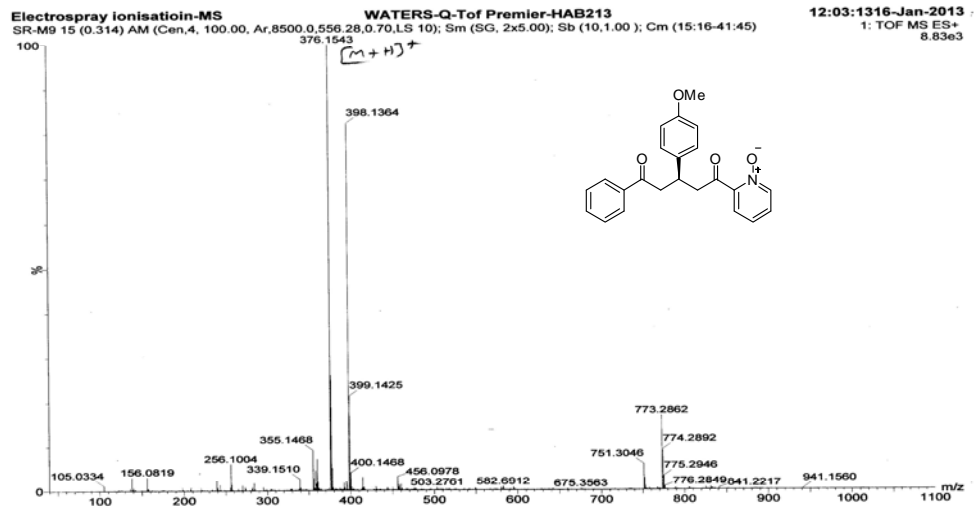

Mass spectrum of compound 4i

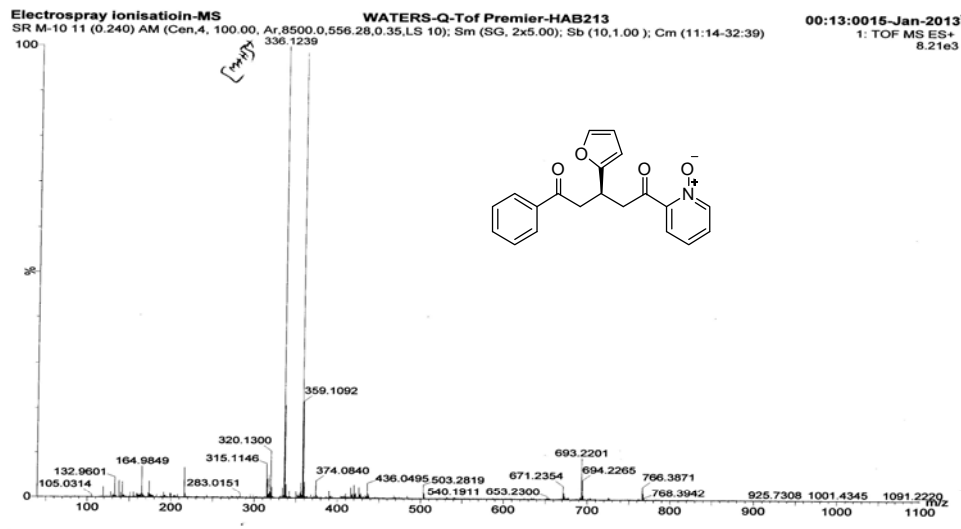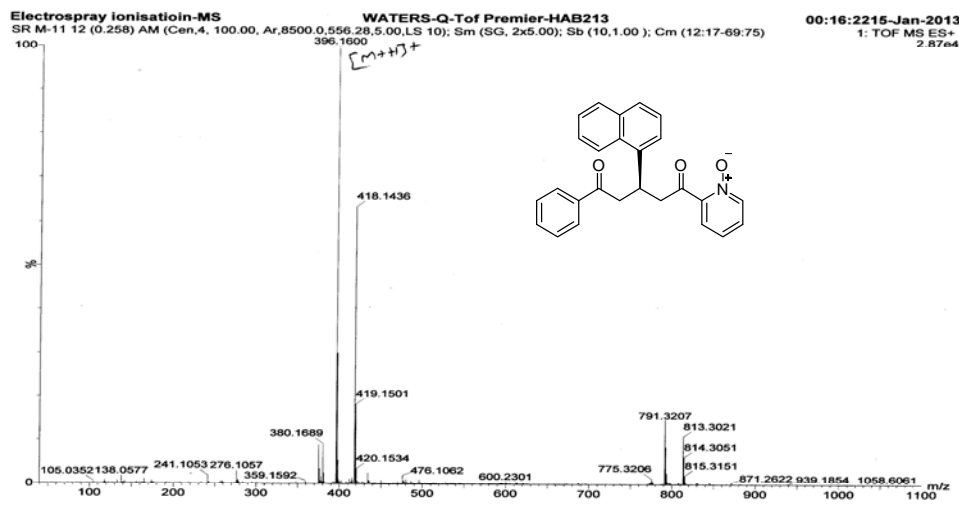



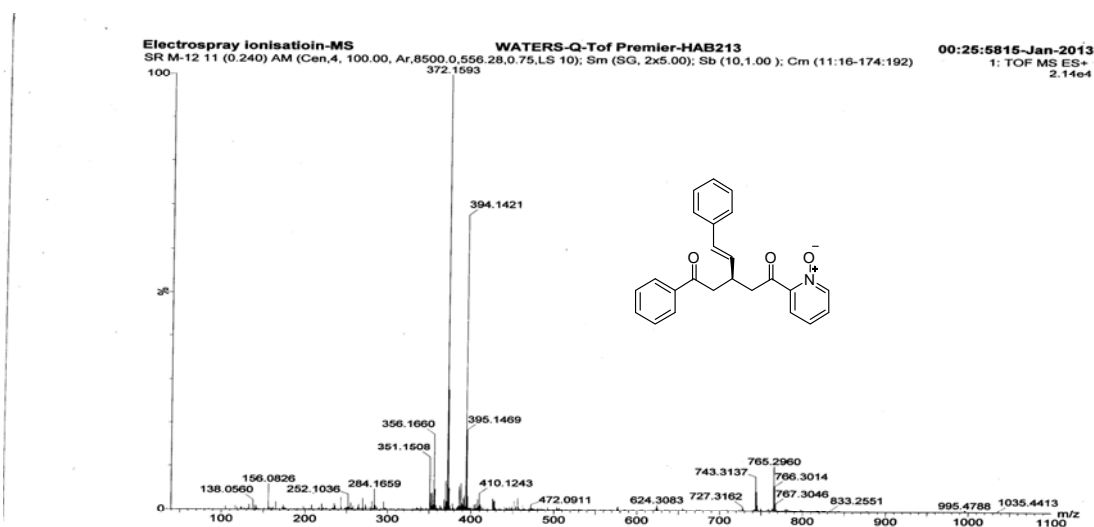

Mass spectrum of compound **4l**

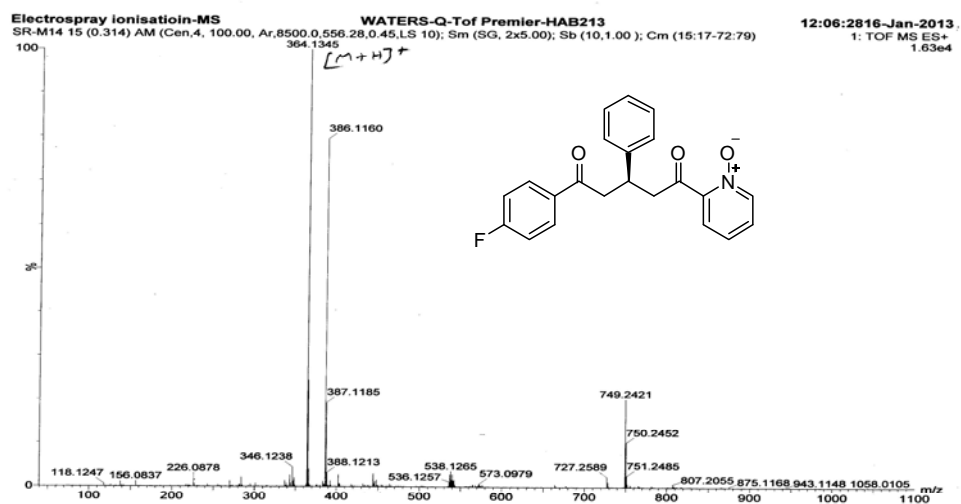

Mass spectrum of compound **4m**

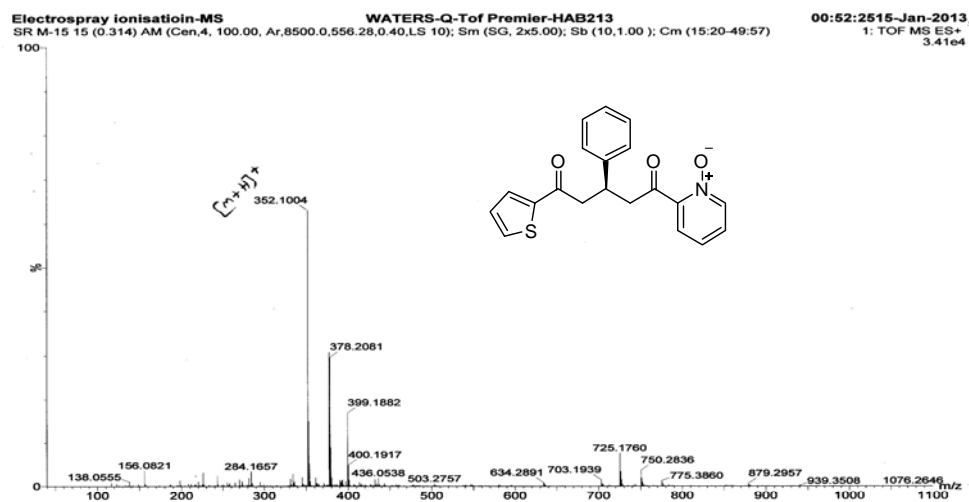

Mass spectrum of compound **4n**

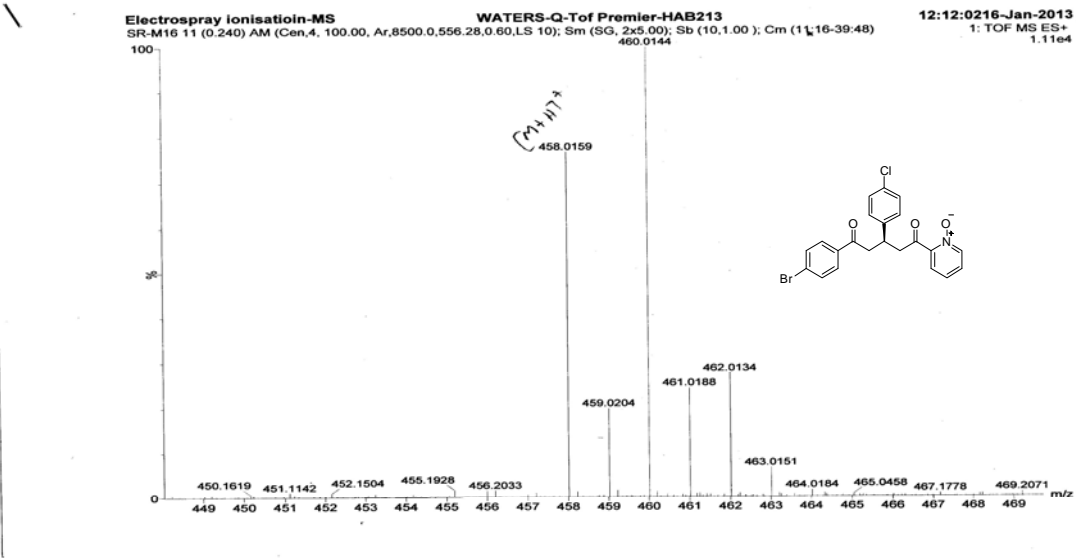

Mass spectrum of compound **4o**

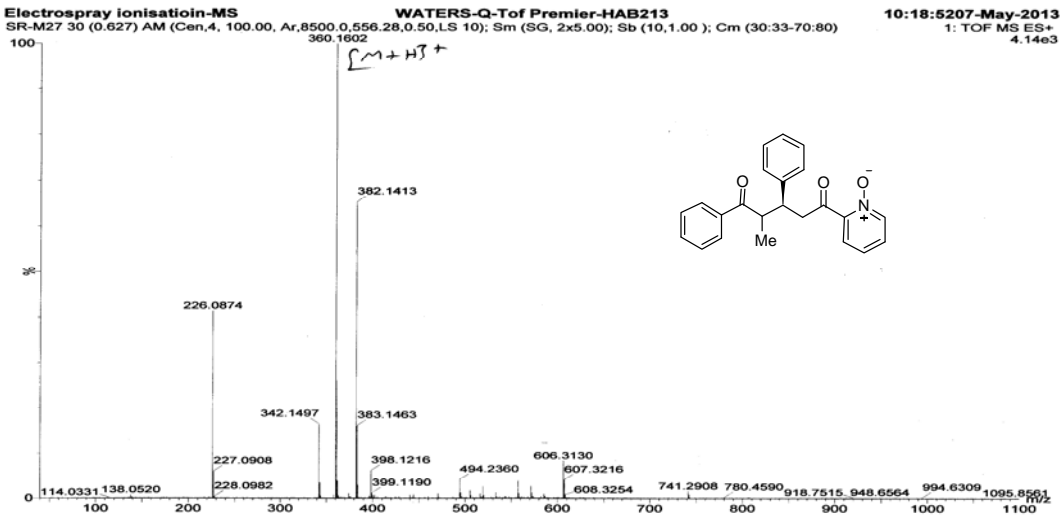

Mass spectrum of compound **6a**

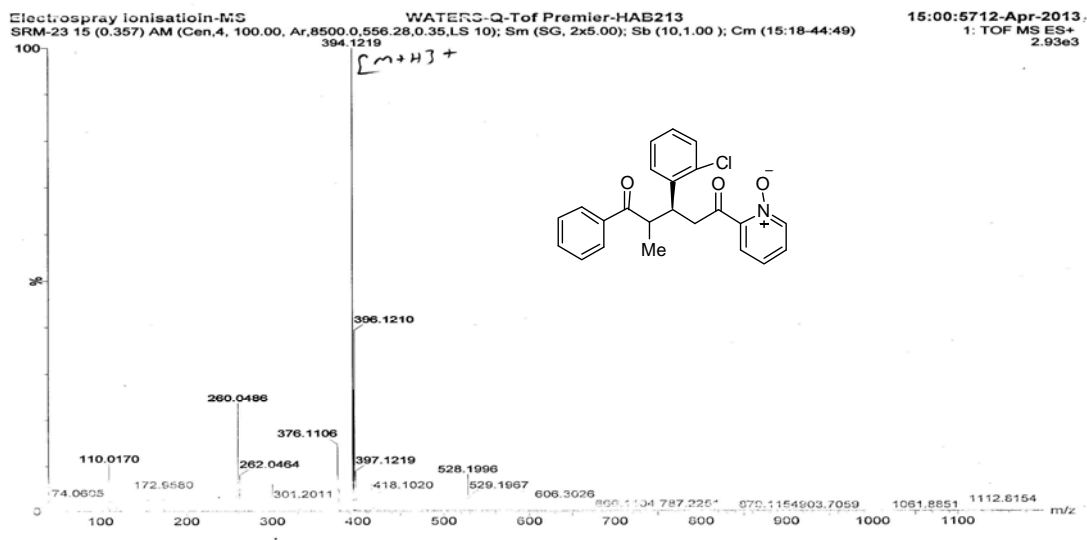

Mass spectrum of compound **6b**

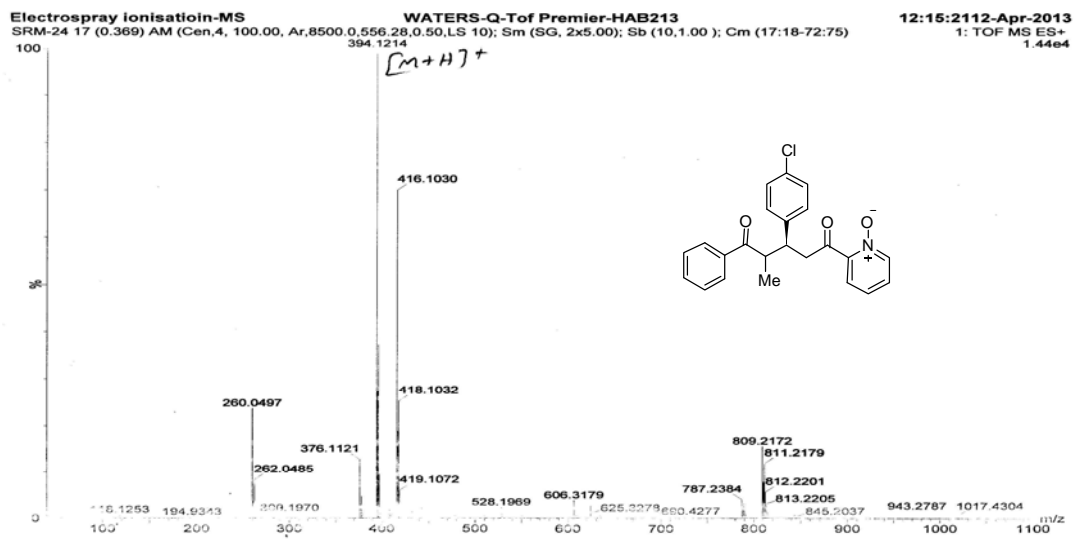

Mass spectrum of compound **6c**

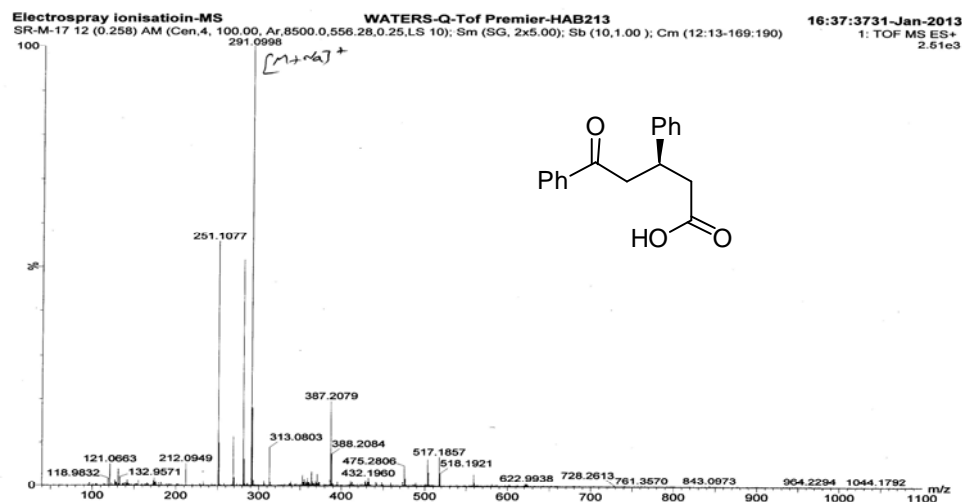

Mass spectrum of compound 7

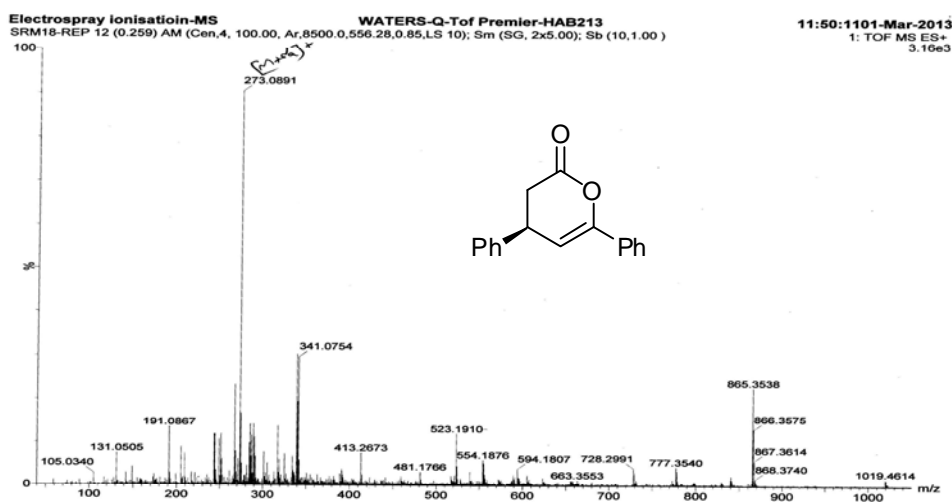

Mass spectrum of compound 8
